# Structure of the large extracellular loop of FtsX and its interaction with the essential peptidoglycan hydrolase PcsB in *Streptococcus pneumoniae*

Britta E. Rued,<sup>ab</sup> Martín Alcorlo,<sup>c</sup> Katherine A. Edmonds,<sup>b</sup> Siseth Martínez-Caballero,<sup>c</sup> Daniel Straume,<sup>d</sup> Yue Fu,<sup>b\*</sup> Kevin E. Bruce,<sup>a</sup> Hongwei Wu,<sup>b</sup> Leiv Sigve Håvarstein,<sup>d</sup> Juan A. Hermoso,<sup>c,#</sup> Malcolm E. Winkler,<sup>a,#</sup> and David P. Giedroc<sup>b,#</sup>.

<sup>a</sup>Department of Biology, Indiana University Bloomington, Bloomington, IN, USA.

<sup>b</sup>Department of Chemistry, Indiana University Bloomington, Bloomington, IN, USA.

<sup>c</sup>Department of Crystallography and Structural Biology, Inst. Química-Física Rocasolano, Consejo Superior de Investigaciones Científicas, Madrid, Spain.

<sup>d</sup>Department of Chemistry, Biotechnology and Food Science, Norwegian University of Life Sciences, N-1432, Ås, Norway.

Running Head: FtsX<sub>ECL1</sub> structure and interaction with PcsB in *S. pneumoniae*

#Address correspondence to David P. Giedroc, [giedroc@indiana.edu](mailto:giedroc@indiana.edu); Juan A. Hermoso, [xjuan@iqfr.csic.es](mailto:xjuan@iqfr.csic.es); and Malcolm E. Winkler, [winklerm@indiana.edu](mailto:winklerm@indiana.edu).

\*Present address: Genentech, South San Francisco, California, USA.

B.E.R. and M.A. contributed equally to this work.

Abstract word count: 163 words

Text word count: 5,664 words

## ABSTRACT

*Streptococcus pneumoniae* is a leading killer of infants and immunocompromised adults and has become increasingly resistant to major antibiotics. Therefore, the development of new antibiotic strategies is desperately needed. Targeting bacterial cell division is one such strategy, specifically targeting essential proteins for the synthesis and breakdown of peptidoglycan. One complex important to this process is FtsEX. FtsEX comprises an integral membrane protein (FtsX) and cytoplasmic ATPase (FtsE) that resembles an ATP-binding cassette (ABC) transporter. Here, we present NMR solution structural and crystallographic models of the large extracellular domain of FtsX, denoted ECL1. The structure of ECL1 reveals an upper extended  $\beta$ -hairpin and a lower  $\alpha$ -helical lobe, each extending from a mixed  $\alpha$ - $\beta$  core. The helical lobe mediates a physical interaction with the peptidoglycan hydrolase PcsB, via the coiled-coil domain of PcsB (PcsB-CC). Characterization of *S. pneumoniae* D39 derived strains harboring mutations in the  $\alpha$ -helical lobe shows that this subdomain is essential for cell viability and required for proper cell division of *S. pneumoniae*.

**IMPORTANCE** FtsX is a ubiquitous bacterial integral membrane protein involved in cell division that regulates the activity of peptidoglycan (PG) hydrolases. FtsX is representative of a large group of ABC3 superfamily proteins that function as “mechanotransmitters,” proteins that relay signals from inside to the outside of the cell. Here we present a structural characterization of the large extracellular loop (ECL1) of FtsX from the human opportunistic pathogen *Streptococcus pneumoniae*. We show a direct interaction between the peptidoglycan hydrolase PcsB and FtsX, and

demonstrate that this interaction is essential for cell viability. As such, FtsX represents an attractive, conserved target for the development of new classes of antibiotics.

## INTRODUCTION

*Streptococcus pneumoniae* is a Gram-positive, opportunistic respiratory pathogen (1-3) that has acquired antibiotic resistance worldwide (4-6). This ovococcal bacterium relies on highly conserved cell wall machinery to divide and grow (7, 8). The cell wall is primarily composed of peptidoglycan (PG), a macromolecule composed of repeating subunits of N-acetylglucosamine and N-acetylmuramic acid linked by PG peptide side chains (9, 10). Regulation of the synthesis and remodeling of PG is essential for bacterial growth and viability, due to the turgor pressure bacterial cells must withstand (10-12). One vital process for the synthesis of PG is the controlled insertion of new strands of PG. This process requires timed cleavage of the old PG matrix to allow incorporation of new nascent strands (13). PG hydrolases are the primary enzymes that carry out PG cleavage and remodeling (14, 15). Thus, regulation of these hydrolases and activation at specific times during the cell cycle is required for proper cell growth. Specific protein complexes are utilized by bacterial cells to regulate these enzymes. This work focuses on understanding the structure and function of one of these protein complexes.

From *Mycobacterium tuberculosis* to *Caulobacter crescentus*, the ABC-transporter-like protein complex FtsEX acts as a key regulator of PG hydrolysis and divisome assembly (16-19). The proposed mechanism of FtsEX activation of PG hydrolases is as follows. FtsE, upon sensing an unknown signal from inside the cell,

hydrolyzes ATP to ADP. Hydrolysis causes a conformational change transmitted through the membrane via FtsX, an integral membrane protein with two extracellular loops, denoted the large (ECL1) and small (ECL2) loops. These extracellular loops interact with either the cell wall hydrolases or with effector proteins, which results in activation of PG hydrolysis via an unknown mechanism (16, 18, 20-25). In *E. coli*, it has been demonstrated that FtsX interacts with the effector protein EnvC to activate the PG amidases AmiA and AmiB (24, 25). In addition, FtsX interacts with other division proteins such as FtsA, where it regulates the polymerization of FtsA and recruitment of downstream division proteins (26). In other organisms including *B. subtilis* and *M. tuberculosis*, FtsEX also activates PG hydrolases (16, 23). Interestingly, FtsEX is non-essential in rod-shaped bacteria such as *E. coli* and *B. subtilis* (23, 24, 26-28). However, in *S. pneumoniae* FtsEX is absolutely essential (21) and depletion of FtsEX results in cell rounding and cessation of growth (20, 21).

In the case of *S. pneumoniae*, genetic experiments suggest that both outward-facing domains of FtsX, ECL1 and ECL2, interact with the essential PG hydrolase PcsB, via its long coiled-coil (CC) domain (20, 21). However, there is little direct biochemical evidence for this interaction. ECL1 and ECL2 are thought to allosterically activate the catalytic activity of cysteine, histidine-dependent amidohydrolase/peptidase (CHAP) domain of PcsB (20). The crystal structure of full-length PcsB including the CC domain, an alanine-rich linker region, and the CHAP domain provides insight into the mechanism of how this may occur (22). While the PcsB structure implies FtsEX activates PcsB by displacing the catalytic domain from the CC domain, the exact nature of the FtsX::PcsB interaction remains unknown.

In order to understand how FtsX activates PcsB, we determined the structure of the large extracellular loop of FtsX (FtsX<sub>ECL1</sub>) by both multidimensional NMR spectroscopy and X-ray crystallography. FtsX<sub>ECL1</sub> harbors a conserved mixed  $\alpha$ - $\beta$  core and a lower  $\alpha$ -helical lobe extending from the core identified previously in *M. tuberculosis* FtsX (16), and an extended  $\beta$ -hairpin that is unique to *S. pneumoniae* FtsX<sub>ECL1</sub>. The N-terminal  $\beta$ 1 and C-terminal  $\beta$ 6 strands are adjacent in the core and connect ECL1 to the TM1 and TM2 helices, respectively, in the membrane. PcsB-CC-mediated chemical shift perturbations of <sup>1</sup>H-<sup>15</sup>N HSQC spectra of FtsX<sub>ECL1</sub> reveal that the helical lobe consisting of the  $\alpha$ 2 helix and the  $\alpha$ 2- $\beta$ 5 linker (residues 107-134) of FtsX<sub>ECL1</sub> interacts with PcsB-CC. To determine if this interaction is required for FtsX function in bacterial cells, we constructed a merodiploid strain that allows for conditional expression of the mutant *ftsX*. We demonstrate that specific amino acid substitutions in the FtsX-PcsB interface are lethal or cause pronounced morphological defects despite the fact these FtsX<sub>ECL1</sub> mutant proteins are expressed at near wild-type levels. These findings support the model that a direct physical interaction between FtsX and PcsB is required for activation of PcsB PG hydrolytic activity.

## RESULTS

**The three-dimensional structure of FtsX<sub>ECL1</sub>.** The three-dimensional structure of FtsX<sub>ECL1</sub> (residues 46-168) was solved by both NMR spectroscopy (Fig. 1A) and X-ray crystallography (Fig. 1B). The folded structure (residues 57-166) reveals a central core composed of a four-stranded antiparallel  $\beta$ -sheet ( $\beta$ 1,  $\beta$ 6,  $\beta$ 4,  $\beta$ 5) and two helices ( $\alpha$ 1 and  $\alpha$ 3), an  $\alpha$ -helical lobe (residues 107-135) harboring the  $\alpha$ 2 helix, and an

extended  $\beta$ -hairpin ( $\beta 2$ ,  $\beta 3$ ). The  $\beta$ -hairpin and helical lobes are connected to the central core by hinges. Details for structural determination of FtsX<sub>ECL1</sub> by NMR are presented in the methods section and structure statistics are summarized in Table 1. The solution structure shows that while the central mixed  $\alpha$ - $\beta$  core adopts a well-defined conformation, the two appended lobes are highly dynamic on multiple timescales (*vide infra*), presenting a range of conformations among the 20 members of the FtsX<sub>ECL1</sub> NMR structural ensemble (Fig. 1A).

Three different structures, with resolutions ranging from 2.0 to 2.3 Å, were solved by X-ray crystallography, each in the presence of a different detergent. The presence of detergents was critical as in their absence crystals diffracted at very low resolution ( $\leq 4$  Å), suggesting significant mobility in some protein regions. Details for the crystallographic determination are provided in the methods section and structure statistics summarized in Table 2. In all cases, two protein molecules are present in the asymmetric unit (Fig. S1), yielding a total of six independent structures and sufficient electron density for both the protein structure and associated detergent molecules (Fig. S2). Different conformations were observed for the  $\beta$ -hairpin and the helical lobe among the six structures depending on the presence and identity of the bound detergent molecule to FtsX<sub>ECL1</sub> (Fig. S1B). The structural variations observed in these crystallographic structures, however, are less dramatic than those observed in the NMR conformer bundle, obtained in the absence of ligand, although the regions with high variability are similar.

In any case, the crystal structures suggest that changes in the protein backbone and side chains of the helical lobe occur when a detergent ligand is bound (Fig. 1C).

These changes create a cavity in which the detergent molecules insert (Fig. 1D), with a large part of the helical lobe affected by the interaction with detergent (from Q111 to E127) (Fig. 1C). Residues Y112, W123, E127 and F126 are strongly perturbed upon detergent ligand binding (Fig. 1C) with the hydroxyl moiety of Y112 interacting with carboxylate of E127. Changes in W123 and F126 stabilize the hydrophobic region of detergent 1. A similar interaction pattern is observed for detergents 2 and 3; additional interactions are observed with N131 with detergents 2 and 3, which are characterized by a larger hydrophilic head (maltose) (Fig. S1E-F). Although a physiological role for detergent binding to the helical lobe is unknown, many of these same residues are important for the interaction with PcsB (*vide infra*).

A structural comparison with *M. tuberculosis* FtsX<sub>ECL1</sub> (16) (PDB 4N8N) reveals differences in both the overall structure (RMSD value of 2.2 Å) and in the appended lobes of the core domain (Fig. 1F). The main differences between the mycobacterial and pneumococcal FtsX<sub>ECL1</sub> domains are the presence of an extra helix ( $\alpha$ 1) and a disulfide bond in *M. tuberculosis* ECL1 that are absent in pneumococcal ECL1, and an extended  $\beta$ -hairpin (residues 71-87) unique to the pneumococcal ECL1 domain. It is worth noting that in *M. tuberculosis* ECL1, the upper and lower lobes form a large hydrophobic cleft with four exposed Phe residues (F61, F110, F113 and F122) and this region was suggested as a strong candidate interaction surface between FtsX and RipC (16). These phenylalanine residues are not conserved in the pneumococcal ECL1 (Fig. 1F-G) but the hydrophobic nature of this region is preserved (Y63, I118, W123 and L133).

**FtsX<sub>ECL1</sub> is dynamic in solution.** We next performed additional NMR experiments to explore the mobility of the FtsX<sub>ECL1</sub> domain, both to validate the heterogeneity of the structural ensemble in solution, and to elucidate function. The  $^1D_{HN}$  residual dipolar couplings (RDCs) obtained by weak alignment in Pf1 filamentous phage correspond well to previously determined secondary structure elements (29), with uniform values for the entire length of  $\alpha1$  and  $\alpha2$ , as expected for straight helices. In contrast,  $^1D_{HN}$  values near 0 for the N-terminal tail, the very C-terminus, and the non-helical part of the helical lobe between  $\alpha2$  and  $\beta5$ , are suggestive of significant conformational disorder in solution (Fig. S3A). These regions of small or zero RDCs are regions of very high RMSD in the NMR structure bundle (Fig. S3B). As anticipated, the correlation between experimentally measured RDCs and predicted RDCs back-calculated from the structures (30) is high, but only in the core subdomain, and match poorly in the  $\beta$ -hairpin for most of the crystal structures (Fig. S3C-D).

We previously reported that the  $^{15}\text{N}\{-^1\text{H}\}$  heteronuclear NOE (hNOE) is low or negative at the termini, indicating that they are highly flexible in solution (29). The hNOE is also smaller in the  $\beta2$ - $\beta3$  hairpin region, as well as in the C-terminal end of the  $\alpha2$  helix and the subsequent coiled region leading into  $\beta5$  (29) (Fig. S3E). Mapping these dynamics data onto a representative structure from the solution NMR ensemble shows that these regions with fast-timescale dynamics correspond to the  $\beta$ -hairpin and the helical lobe (Fig. S3F). Information on ps-ns fast-timescale motions extracted from the  $R_2/R_1$  ratio also reveals that  $\alpha2$ - $\beta5$  linker is highly flexible, while the  $\beta1$ - $\beta2$  linker and  $\beta$ -hairpin show an elevated  $R_2/R_1$  ratio, specifically indicative of millisecond-timescale slow conformational exchange (Fig. S3G-H). These findings were directly confirmed by



(Carr-Purcell-Meiboom-Gill) relaxation dispersion NMR spectroscopy (31) (Fig. S3I-J). We conclude that the  $\beta$ -hairpin exhibits flexibility on both the sub-ns and ms timescales. Interestingly, the  $\beta$ 1- $\beta$ 2 linker also shows increased B-factors that are qualitatively consistent with ms-timescale conformational exchange observed by NMR.

These complex motions observed in the solution dynamics experiments are reflected in the heterogeneity of the NMR structure, with high  $C\alpha$  RMSDs particularly in the  $\alpha$ 2- $\beta$ 5 linker but also in the  $\beta$ -hairpin and  $\beta$ 1- $\beta$ 2 linker, thus validating the conformational spread in the ECL1 structure in solution (Fig. S3B). The dynamic nature of the helical lobe is also reflected in the heterogeneity and B-factors of the crystal structures (Fig. S3K-L). Full-length FtsX itself is likely a dimer *in vivo* (32), and one can speculate that the flexible helical lobe and  $\beta$ -hairpin regions may contribute to dimerization or to interactions with a binding partner such as PcsB.

**The PcsB coiled-coil (PcsB-CC) domain interacts with FtsX<sub>ECL1</sub>.** The  $^1\text{H}$ - $^{15}\text{N}$  HSQC spectrum for ECL1 has excellent chemical shift dispersion and lends itself readily to studies of protein-protein interactions (Fig. S4A). In contrast, full-length PcsB is 42 kDa and forms a dimer, and is thus challenging to study by NMR due to its size. We therefore constructed truncation mutants of PcsB focusing on the coiled-coil domain (PcsB-CC), thus limiting the molecular weight to 23-24 kDa.  $^{15}\text{N}$  labeled PcsB-CC (47-267) and PcsB-CC (47-254) are both characterized by  $^1\text{H}$ - $^{15}\text{N}$  HSQC spectra with limited  $^1\text{H}$  signal dispersion (Fig. S6A), consistent with the high helical content of this domain. Circular dichroism confirms that these proteins are primarily  $\alpha$ -helical, in

agreement with the crystal structure (22), thus indicating that they are properly folded (Fig. S6A) and can be used for ECL1 binding studies.

To determine if PcsB physically interacts directly with FtsX<sub>ECL1</sub>, we titrated unlabeled PcsB-CC (47-267) into <sup>15</sup>N labeled FtsX<sub>ECL1</sub> at molar ratios of 1:1, 2:1, 4:1, and 6:1, respectively, and recorded <sup>1</sup>H-<sup>15</sup>N HSQC spectra (Fig. S4A-B). Numerous crosspeaks move in response to the addition of PcsB-CC to <sup>15</sup>N FtsX<sub>ECL1</sub>. The largest changes occur in the helical lobe of FtsX<sub>ECL1</sub> (Fig. 2A, S4-S5). In particular, residues M119, W123, I125, F126, G128 exhibit the greatest changes in crosspeak position and intensity in the 1:2 FtsX<sub>ECL1</sub> to PcsB-CC sample (Fig. 2A, Fig. S4C); when additional PcsB-CC is added, these crosspeaks broaden beyond detection (Fig. S5B-C). A reciprocal <sup>1</sup>H-<sup>15</sup>N HSQC experiment with <sup>15</sup>N labeled PcsB-CC (47-254) further confirms an interaction with unlabeled FtsX<sub>ECL1</sub> (Fig. S6B), as multiple crosspeaks shift upon the addition of increasing FtsX<sub>ECL1</sub> (Fig. S6B). We measured the binding affinity of the FtsX<sub>ECL1</sub>-PcsB-CC complex using isothermal titration calorimetry (ITC), which reveals a  $K_a$  of  $3.0 \times 10^4 \text{ M}^{-1}$  ( $K_d \sim 34 \text{ }\mu\text{M}$ ) (Table 3, Fig. 2B). These data provide the first biochemical evidence for a direct physical interaction between PcsB-CC and FtsX<sub>ECL1</sub> (Fig. 2, Fig. S4-S6).

**The interaction region of FtsX<sub>ECL1</sub> with PcsB-CC is essential for cell growth and proper morphology.** Having identified the interaction region between FtsX<sub>ECL1</sub> and PcsB-CC, we next sought to determine the degree to which this interaction interface mapped by NMR spectroscopy contributes to pneumococcal viability. A multiple sequence alignment of this region (residues 102-155) among bacterial species in which FtsX has been studied and in related Streptococcal species (Fig. S7A) reveals

that amino acids in this region are either partially or completely conserved (Fig. S7A). We therefore decided to target E109, Q111, L115, M119, W123, F126, and N131 singly or in combination for substitution with alanine (Fig. S7A). Given the essentiality of the FtsX<sub>ECL1</sub> and PcsB-CC interaction, we predicted that mutating these residues might be lethal (20). To allow for the cross-in of potentially lethal point mutations, we employed the Janus cassette method to insert point mutations at the native site of *ftsX* into a strain containing an ectopic copy of *ftsX*<sup>+</sup> under a zinc inducible promoter (33) (Fig. S7B). We then transformed markerless mutant alleles of *ftsX* in the presence of zinc. This allows for expression of the wild-type *ftsX*<sup>+</sup> and mutant *ftsX* simultaneously. As long as the mutant *ftsX* is not dominant negative, we could obtain a strain that expresses the wild-type copy of *ftsX*<sup>+</sup> under zinc induction and mutant *ftsX* only in the absence of zinc (Fig. S7B).

Zinc toxicity has been observed to cause aberrant cell morphology and growth inhibition in *S. pneumoniae*, when cells are not supplemented with manganese (34, 35). To rule out any deleterious effects of the zinc/manganese (Zn/Mn) addition used to induce *ftsX* expression, we measured the growth of the parent and the FtsX merodiploid strain in the presence of these metals. To verify that the addition of 0.45 mM ZnCl<sub>2</sub> and 0.045 mM MnSO<sub>4</sub> (Zn/Mn) did not cause growth or morphological defects, cells were grown in the presence and absence of Zn/Mn and imaged at 3 h and 6 h into the growth curve (Fig. S7C-D). Wild-type cells (D39  $\Delta$ *cps rpsL1*) had no morphological or growth defects at these time points with or without the addition of Zn/Mn (Fig. S7C-E).

In contrast, the FtsX merodiploid strain (P<sub>zn-ftsX</sub>  $\Delta$ *ftsX*) had significant morphological and growth defects at 3 or 6 h in the absence of Zn/Mn (Fig. S7C-E).

Cessation of growth and aberrant cell morphology was observed in 90% of cells at 3 h and 95% of cells at 6 h growth (Fig. S7D). These cells are significantly shorter and rounder than wild-type cells (Fig. S7E), and a large variability in their volumes was observed (Fig. S7E), as previously found for a strain expressing *ftsX*<sup>+</sup> under a fucose-inducible promoter (21). If the strain was grown in the presence of Zn/Mn, FtsX was expressed and the strain has no growth or morphological defects (Fig. S7C-E). This indicates the defects observed are solely due to the absence of FtsX.

We next constructed three classes of amino acid substitution or insertion mutants (Table 4) in an effort to disrupt the FtsX<sub>ECL1</sub>-PcsB-CC interaction defined by NMR spectroscopy. These are designated Class I (single amino acid changes), Class II (multiple amino acid changes), and Class III (insertion of a (Gly<sub>3</sub>Ser)<sub>2</sub> linker) mutants. Class I strains were made by introducing single amino acid substitutions in the merodiploid strain and measuring growth or morphology defects (Fig. S8, Table 4). Class I mutants targeted both the α2 helix and the loop region (residues 107-120, and 121-130, respectively) of the FtsX<sub>ECL1</sub> helical lobe (Table 4, Fig. 3A, S8A). Single amino acid substitutions of FtsX (E109A, L115A, M119A, W123A, F126A, N131A, N131D) exhibited morphological defects without Zn/Mn (Fig. S8C-D, Table 4), but did not induce a measurable growth phenotype (Fig. S8B and Table 4). Expression of FtsX (L115A) resulted in cell shape defects (aspect ratio, length, width, and volume) (Fig. S8C-D), while expression of FtsX (M119A) only resulted in a change in cell volume (Fig. S8D). These differences were not due to mis-expression of FtsX, as western blotting indicates that all were expressed at or near wild-type levels (Fig. 4C). Two other single amino

acid substitutions (E109Q and Q111A) did not strongly affect growth, morphology, or expression (Table 4, Fig. 4D).

In contrast to the somewhat modest physiological impact of Class I substitutions, selected Class II mutants (Table 4) exhibited severe morphological and growth defects (Fig. 3 and S9, Table 4). In strains targeting the  $\alpha 2$  helix, FtsX(E109A, Q111A, L115A, M119A), or the coil, FtsX(F126A, W123A, N131A),  $\geq 98\%$  of cells had severe growth and morphology defects. The growth and morphology of these strains was similar to *ftsX* depleted cells (Fig. 3B-D). Cells expressing these *ftsX* alleles became significantly rounder and shorter (Fig. 3D), and growth was inhibited without zinc (Fig. 3B). Importantly, in the presence of zinc the cells were indistinguishable from wild-type at 3 h (Fig. 3D). At 6 h with zinc, these cells exhibited changes in width and volume, which could be due to overexpression of FtsX at this time point or expression of wild-type and mutant FtsX simultaneously (Fig. 3D). Western blotting confirmed that FtsX(E109A, Q111A, L115A, M119A) and FtsX(F126A, W123A, N131A) were expressed in the absence of zinc at 6 h post-depletion (Fig. 4A). The triple FtsX(F126A, W123A, N131A) mutant migrated slightly higher on an SDS-PAGE gel compared to wild-type FtsX in the absence of zinc, but was expressed (Fig. 4A). Taken together, these results reveal that both the  $\alpha 2$  helix and loop in the helical lobe of FtsX<sub>ECL1</sub> are important for FtsX function *in vivo* and confirm the functional importance of the physical interaction of FtsX and PcsB mapped by NMR.

Some of the Class II mutants we characterized had just two amino acid changes in the  $\alpha 2$  helix or the extended loop of the helical lobe (Table 4, Fig. S9). We observed that FtsX (L115A, M119A) exhibited a strong growth and morphology defect in the

absence of zinc in 99% of cells at 6 h (Fig. S9B-C, Table 4), and these cells displayed a decrease in length, width, and volume relative to wild-type cells (Fig. S9D). This mutant was expressed in the absence of zinc at near wild-type levels (Fig. 4B). These data confirm that the tandem L115A, M119A substitution disrupts FtsX function, even though as individual single mutants they result only in slight morphological defects (Fig. S8B-D, Fig. S9B-D, Table 4). Another double mutant FtsX(Q111A, L115C) induced the formation of long chains and a “boxy” cell morphology (Fig. S9C, Table 4). This mutant resulted in shorter cells with a significantly different aspect ratio from wild-type (Fig. S9D), but this strain had no growth phenotype (Fig. S9B). In contrast, another double substitution Class II mutant, e.g., FtsX(E109A, N131A) (Table 4) exhibited no strong morphology or growth defects.

Finally, Class III insertion mutants (Table 4) were constructed and used to evaluate if other regions of FtsX<sub>ECL1</sub> were important for the FtsX<sub>ECL1</sub>-PcsB interaction or for FtsX function. We inserted a (Gly<sub>3</sub>Ser)<sub>2</sub> flexible linker approximately where the FtsX<sub>ECL1</sub> is predicted to enter (residue 51) or exit (residue 173) the membrane bilayer, or in the  $\beta$ -hairpin, which exhibits significant conformational disorder over a range of timescales (Fig. 1A). An insertion after residue 51 in FtsX<sub>ECL1</sub> was detrimental to both growth and morphology (Table 4), and this insertion did not disrupt FtsX expression (Fig. 4E). The insertion after residue 173 in FtsX<sub>ECL1</sub> also caused growth and morphology defects, but this FtsX allele was not expressed in cells (Table 4, Fig. 4E). The  $\beta$ -hairpin (Gly<sub>3</sub>Ser)<sub>2</sub> insertion (Fig. 1B, Appendix) was introduced after amino acid 78 of FtsX<sub>ECL1</sub>, which corresponds to the tip of  $\beta$ -turn in the  $\beta$ -hairpin (Fig. 1B). This strain also exhibited no growth defect, but these cells were significantly smaller, but only at the 3 h

time point (Appendix). We conclude that the  $\beta$ -hairpin does not play a major role in FtsX-PcsB interaction, consistent with the NMR mapping experiments.

**L115A/M119A FtsX<sub>ECL1</sub> is stably folded and unable to bind PcsB-CC.** We reasoned that if the defects observed in Class I and Class II mutants were due to the disruption of the FtsX<sub>ECL1</sub>-PcsB-CC interaction, this should impact the affinity of this interaction as measured by ITC. We first characterized the L115A/M119A mutant by <sup>1</sup>H-<sup>15</sup>N NMR and CD spectroscopies to confirm its structural integrity. The CD spectrum resembled wild type, as did the <sup>1</sup>H-<sup>15</sup>N HSQC spectrum, with clear chemical shift perturbations only among those resonances in the immediate vicinity of the double substitution (Fig. S10B). Both pieces of data suggest a local rather than global perturbation of  $\alpha$ 2-loop lobe in the FtsX<sub>ECL1</sub> structure upon introduction of the double L115A/M119A substitution. As anticipated, titration of PcsB-CC (47-267) with L115A/M119A FtsX<sub>ECL1</sub> reveals no detectable binding (no observable heat) (Fig. 2B, Table 3) compared to wild-type FtsX<sub>ECL1</sub>. These data confirm that the helical lobe of FtsX<sub>ECL1</sub> interacts with PcsB-CC, and that this interaction is required for viability and proper cell shape.

In contrast to the L115A/M119A double mutant, severely functionally compromised representative triple mutant W123A, F126A, N131A FtsX<sub>ECL1</sub> and quadruple mutant E109A, Q111A, L115A, M119A FtsX<sub>ECL1</sub> exhibited more pronounced structural perturbations that nonetheless map only to the helical lobe. The triple mutant was indistinguishable from the L115A/M119A and wild-type FtsX<sub>ECL1</sub> derivatives by CD spectroscopy while the quadruple mutant exhibited less molar ellipticity, or secondary structure (Fig. S10D). Inspection of their <sup>1</sup>H-<sup>15</sup>N HSQC spectra reveal that although the

core and  $\beta$ -hairpin domains essentially resemble wild-type, each exhibits considerable perturbation of resonances throughout the entire helical lobe (Fig. S10A, S10C). Since these mutants are functionally compromised, these structural findings strongly support the conclusion that the structural integrity of the lower lobe is essential for the physical interaction with PcsB, and the function of FtsX in pneumococcal cells.

## DISCUSSION

This study presents a comprehensive analysis of the solution and x-ray structures of the outward-facing large extracellular loop of FtsX (FtsX<sub>ECL1</sub>) from *S. pneumoniae* and defines a physical interaction site with the coiled-coil domain of peptidoglycan hydrolase PcsB (PcsB-CC). Our FtsX<sub>ECL1</sub> structures reveal a globular fold that while similar to the large extracellular loop of FtsX from *M. tuberculosis* (16) is characterized by unique features. The upper  $\beta$ -hairpin distinguishes *S. pneumoniae* FtsX<sub>ECL1</sub> from that of *M. tuberculosis*, and despite being characterized by significant conformational dynamics on a range of timescales, is not required for the interaction of *S. pneumoniae* FtsX<sub>ECL1</sub> with PcsB. The function of this domain is not well-defined by our data, but could play a role in another process, e.g., FtsX dimerization, interaction with the small loop ECL2, or an interaction with another domain of PcsB. On the other hand, the helical lobe of FtsX<sub>ECL1</sub>, common to both *S. pneumoniae* and *M. tuberculosis* FtsX structures, is vital for the interaction PcsB *in vitro*, and that this interface is functionally important *in vivo*. Increasing numbers of Ala substitutions tested here increasingly disrupt this interaction and ultimately cause dramatic growth and morphology defects, indicating that the helical lobe of FtsX<sub>ECL1</sub> is essential for regulation



of PcsB during cell division. Interestingly, this region of FtsX<sub>ECL1</sub> corresponds with the region shown to be important for the interaction of *M. tuberculosis* FtsX<sub>ECD</sub> with its PG hydrolase, RipC (16). This suggests that the helical lobe could be a conserved functional determinant for the interaction of FtsX with cognate hydrolases or adaptor proteins across many species of bacteria.

We propose that the helical lobe of FtsX<sub>ECL1</sub> is important for the activation of cognate hydrolase activity either directly or indirectly through their adaptors (Fig. 5). The exact role of the second extracellular loop of FtsX (FtsX<sub>ECL2</sub>) is unknown, but may also regulate this process, as temperature-sensitive mutations in *pcsB* were found to be suppressed by mutations in the coding region for FtsX<sub>ECL2</sub> (20). Previous work suggests that FtsEX forms a dimer (32), as dimerization of the FtsE ATPase domain is likely a necessary condition for ATP hydrolysis (36, 37) (Fig. 5A). After formation of the complex, ATP hydrolysis by FtsE results in a conformational change in FtsX, releasing PcsB from what we anticipate is an inhibited state (22) (Fig. 5B-C). This interaction is mediated by the helical lobe of FtsX<sub>ECL1</sub>, although the membrane, and possibly lipid binding by FtsX<sub>ECL1</sub> and FtsX<sub>ECL2</sub> itself also may play a role as well. We propose that the interaction of FtsX<sub>ECL1</sub> with the PcsB coiled-coil domain communicates release of the PcsB CHAP domain from an inhibited state and thus is important for modulating PG hydrolysis by PcsB (Fig. 5B-C).

Recently, the structure of *A. actinomycetemcomitans* MacB was reported and suggested to be a structural paradigm for the ABC3 transporter superfamily that includes FtsX (38). MacB was proposed to function as a mechanical pump to drive enterotoxin transport through TolC in *E. coli* (38). Crow *et. al* found that MacB itself did

not transport enterotoxin but drove TolC to transport it instead, due to the lack of a central cavity in the MacB structure (38). As such, they proposed that MacB as a model for other “mechanotransmitters” belonging to this same ABC3 transporter superfamily. While this proposed function of mechanotransmission may well characterize MacB and FtsX, the overall structure of FtsX<sub>ECL1</sub> from *S. pneumoniae* is clearly distinct from the periplasmic domain of MacB, thus revealing that MacB does not readily provide a structural basis for understanding FtsX-dependent peptidoglycan hydrolases. Future work using reconstituted FtsEX and PcsB complexes in membranes will allow for understanding how this common mechanotransmission principle extends throughout the ABC3 superfamily.

## MATERIALS AND METHODS

**NMR Spectroscopy.** Spectra of <sup>15</sup>N- or <sup>15</sup>N<sup>13</sup>C-labeled FtsX<sub>ECL1</sub> were recorded at 298 K on Varian (Agilent) DDR 600 or 800 MHz spectrometers equipped with cryogenic probes in the METACyt Biomolecular NMR Laboratory at Indiana University Bloomington. NMR samples contained 50 mM potassium phosphate, pH 7.0, 50 mM NaCl and 10% v/v D<sub>2</sub>O, with 0.2 mM 4,4-dimethyl-4-silapentane-1-sulfonic acid (DSS) for chemical shift referencing. Typical concentrations of FtsX<sub>ECL1</sub> for <sup>15</sup>N HSQC spectra were 50 μM, and 400 μM for triple-resonance and dynamics experiments. <sup>1</sup>J<sub>HN</sub> splittings for residual dipolar couplings (RDCs) were measured using 2D IPAP [<sup>15</sup>N, <sup>1</sup>H]-HSQC spectra (39), recorded on an isotropic sample and on a sample aligned with 20 mg/mL phage Pf1 (ASLA Biotech). <sup>1</sup>D<sub>HN</sub> was calculated from <sup>1</sup>D<sub>HN</sub> = <sup>1</sup>J<sub>HN</sub> (anisotropic) – <sup>1</sup>J<sub>HN</sub> (isotropic). Aromatic sidechains were assigned using the HBCBCGCDHE and

HBCBCGCDCEHE experiments (40). For experiments detecting PcsB-CC binding,  $^{15}\text{N}$  FtsX<sub>ECL1</sub> was kept at 50  $\mu\text{M}$  concentration, and  $^1\text{H}$ - $^{15}\text{N}$  HSQC spectra were recorded with the following concentrations of PcsB-CC (47-267): 0, 50  $\mu\text{M}$ , 100  $\mu\text{M}$ , 200  $\mu\text{M}$ , and 400  $\mu\text{M}$ . nmrPipe, Sparky, CARA (<http://cara.nmr.ch>), CCPNMR, and NMRbox (41-44) were used for data processing and analysis. Resonance assignments and dynamics data are available in the BMRB under accession code 30523. These NMR data were used to calculate and refine the solution structure of ECL1 (see *Supplemental Materials and Methods*) with the ensemble of 20 lowest energy structures (see Table 1 for structure statistics) deposited in the Protein Data Bank (accession code 6MK7).

**X-Ray Crystallography.** First crystallization screenings were performed by high-throughput techniques in a NanoDrop robot and Innovadyne SD-2 microplates (Innovadyne Technologies Inc.), screening PACT Suite and JCSG Suite (Qiagen), JBScreen Classic 1-4 and 6 (Jena Bioscience) and Crystal Screen, Crystal Screen 2 and Index HT (Hampton Research). Positive conditions in which crystals grew were optimized by sitting-drop vapor-diffusion method at 291 K by mixing 1  $\mu\text{L}$  of protein solution and 1  $\mu\text{L}$  of precipitant solution, equilibrated against 150  $\mu\text{L}$  of precipitant solution in the reservoir chamber. The best crystals were obtained in a crystallization condition containing 0.1 M sodium citrate pH=5.6, 0.2 M potassium-sodium tartrate and 2 M ammonium sulfate. These crystals were further optimized by cocrystallization in the presence of detergents Dodecyltrimethylammonium chloride (detergent 1, 46  $\mu\text{M}$ ), n-Undecyl- $\beta$ -D-maltoside (detergent 2, 0.59 mM), and n-Decyl- $\beta$ -D-maltoside (detergent 3, 1.8 mM). Crystals were cryo-protected in the precipitant solution supplemented with 25% (v/v) glycerol, prior to flash cooling at 100 K. Diffraction data were collected in

beamline XALOC at the ALBA synchrotron (CELLS-ALBA, Spain), using a Pilatus 6M detector and a wavelength of 0.979257 Å. Crystals diffracted up to 2.0-2.3 Å resolution and belonged to the  $P 4_3 2_1 2$  space group. The collected datasets were processed with XDS (45) and Aimless (46). Two FtsX<sub>ECL1</sub> molecules were found in the asymmetric unit, yielding a Matthews coefficient of 2.49 Å<sup>3</sup>/Da (47) and a solvent content of 50.73%. Structure determination was performed by molecular replacement using the online server Morda (<http://www.biomexsolutions.co.uk/morda/>). Refinement and manual model building were performed with Phenix (48) and Coot (49), respectively. The data presented translational non-crystallographic symmetry that were treated with Phenix (48). The stereochemistry of the final model was checked by MolProbity (50). Data collection and processing statistics are shown in Table 2. The atomic coordinates of FtsX<sub>ECL1</sub> determined by co-crystallization in the presence of detergents 1, 2 and 3 have been deposited in the Protein Data Bank with codes 6HE6, 6HEE and 6HFX, respectively.

**Bacterial strains, plasmids, and growth conditions.** Bacterial strains and plasmids used in this study are listed in Table S1. *S. pneumoniae* strains were derived from IU1945, an unencapsulated derivative of serotype 2 *S. pneumoniae* strain D39 (51). Strains were grown on trypticase soy agar II with 5% (vol/vol) defibrinated sheep blood (TSAII-BA) plates or in Becton-Dickinson brain heart infusion (BHI) broth at 37°C in an atmosphere of 5% CO<sub>2</sub>. *E. coli* strains for protein expression were derived from BL21(DE3) (NEB, C2527H). *E. coli* strains were grown in Luria-Bertani (LB) broth or in M9 minimal media supplemented with <sup>15</sup>NH<sub>4</sub>Cl at 37°C, with shaking at 150 rpm. When required, tetracycline (0.25-2.5 µg/mL), kanamycin (250 µg/mL), spectinomycin (150

µg/mL), streptomycin (250 µg/mL), ampicillin (100 µg/mL) and/or isopropyl β-D-1-thiogalactopyranoside (IPTG, 1 mM) were added to *S. pneumoniae* or *E. coli* culture media. *S. pneumoniae* strains requiring zinc for expression of essential genes were grown with 0.45 mM ZnCl<sub>2</sub> and 0.045 MnSO<sub>4</sub>.

**Growth curves and phase-contrast microscopy of strains.** For physiological and morphological analyses of strains, cells were inoculated from frozen glycerol stocks into BHI broth, serially diluted, and incubated for 10-12 hours statically at 37°C in 5% CO<sub>2</sub> overnight. If zinc was required for growth of cultures, 0.45 mM ZnCl<sub>2</sub> and 0.045 MnSO<sub>4</sub> was added to overnight tubes. The next day, cultures from OD<sub>620</sub> ≈ 0.05 to 0.4 were diluted into fresh BHI to OD<sub>620</sub> ≈ 0.003 in 4 mL volumes, and two identical cultures for each strain were prepared, one with 0.45 mM ZnCl<sub>2</sub>/0.045 MnSO<sub>4</sub> and one without. These cultures were grown under the same growth conditions as previously described in *Materials and Methods*. Growth was monitored turbidimetrically every 45 min to 1 hour with a Genesys 2 spectrophotometer (Thermo Scientific). For microscopic analyses, samples (1-2 µL) were taken at 3 hours and 6 hours and examined using a Nikon E-400 epifluorescence phase-contrast microscope with a 100X Nikon Plan Apo oil-immersion objective (numerical aperture, 1.40) connected to a CoolSNAP HQ2 charged-coupled device (CCD) camera (Photometrics). Images were processed using NIS-Elements AR software (Nikon), and measurements and calculation of cell width, length, volume, and aspect ratio were performed as described previously (52, 53). Statistical significance was determined using GraphPad Prism (GraphPad Software, Inc) by comparing values for cell width, length, volume, and aspect ratio measured for at least 50 cells over two experimental replicates. To determine if values were significantly

different between strains and conditions, a Kruskal-Wallis (one-way ANOVA) with Dunn's multiple comparison post-test was used.

**For additional materials and methods, please see Supplemental Materials and Methods.**

## **ACKNOWLEDGEMENTS**

We thank the members Winkler and Giedroc labs for their helpful discussion and insight, specifically Dr. Tiffany Tsui, Dr. Julia Martin, Melissa Lamanna and Dr. Hui Peng. We acknowledge the Indiana University Bloomington Department of Chemistry Mass Spectrometry Facility, specifically Dr. Jonathan Karty and Angela Hansen for their help with training and setting up mass spectrometry experiments and the MetaCyt Biomolecular NMR Laboratory. We also thank Dr. Daiana Capdevila for her help in acquiring and analyzing the isothermal titration calorimetry data, the Indiana University Biological Mass Spectrometry Facility and Dr. Giovanni Gonzales-Gutierrez in the Physical Biochemistry Instrumentation Facility at Indiana University Bloomington. We thank the staff from ALBA synchrotron facility for help during crystallographic data collection. This work was supported by NIH grants R01GM114315 and R01GM127715 to M.E.W., and NIH grant R35GM118157 to D.P.G. and by predoctoral Quantitative and Chemical Biology (QCB) NIH institutional training grant T32 GM109825 (to B.E.R.). The work in Spain was supported by grant from the Spanish Ministry of Science, Innovation and Universities BFU2017-90030-P to J.A.H.

## REFERENCES

1. Henriques-Normark B, Normark S. 2010. Commensal pathogens, with a focus on *Streptococcus pneumoniae*, and interactions with the human host. *Exp Cell Res* 316:1408-14.
2. Kadioglu A, Weiser JN, Paton JC, Andrew PW. 2008. The role of *Streptococcus pneumoniae* virulence factors in host respiratory colonization and disease. *Nat Rev Microbiol* 6:288-301.
3. Chao Y, Marks LR, Pettigrew MM, Hakansson AP. 2014. *Streptococcus pneumoniae* biofilm formation and dispersion during colonization and disease. *Front Cell Infect Microbiol* 4:194.
4. Feldman C, Anderson R. 2014. Recent advances in our understanding of *Streptococcus pneumoniae* infection. *F1000Prime Rep* 6:82.
5. CDC. 2013. Antibiotic resistance threats in the United States, 2013. <http://www.cdc.gov/drugresistance/threat-report-2013/>,
6. Garcia-Bustos J, Tomasz A. 1990. A biological price of antibiotic resistance: major changes in the peptidoglycan structure of penicillin-resistant pneumococci. *Proc Natl Acad Sci U S A* 87:5415-9.
7. Massidda O, Novakova L, Vollmer W. 2013. From models to pathogens: how much have we learned about *Streptococcus pneumoniae* cell division? *Environ Microbiol* 15:3133-57.
8. Sham LT, Tsui HC, Land AD, Barendt SM, Winkler ME. 2012. Recent advances in pneumococcal peptidoglycan biosynthesis suggest new vaccine and antimicrobial targets. *Curr Opin Microbiol* 15:194-203.

- 526 9. Egan AJ, Cleverley RM, Peters K, Lewis RJ, Vollmer W. 2017. Regulation of  
527 bacterial cell wall growth. *FEBS J* 284:851-867.
- 528 10. Vollmer W, Blanot D, de Pedro MA. 2008. Peptidoglycan structure and  
529 architecture. *FEMS Microbiol Rev* 32:149-67.
- 530 11. Rajagopal M, Walker S. 2017. Envelope Structures of Gram-Positive Bacteria.  
531 *Curr Top Microbiol Immunol* 404:1-44.
- 532 12. Rojas ER, Huang KC. 2018. Regulation of microbial growth by turgor pressure.  
533 *Curr Opin Microbiol* 42:62-70.
- 534 13. Holtje JV. 1998. Growth of the stress-bearing and shape-maintaining murein  
535 sacculus of *Escherichia coli*. *Microbiol Mol Biol Rev* 62:181-203.
- 536 14. Holtje JV, Heidrich C. 2001. Enzymology of elongation and constriction of the  
537 murein sacculus of *Escherichia coli*. *Biochimie* 83:103-8.
- 538 15. Alcorlo M, Martinez-Caballero S, Molina R, Hermoso JA. 2017. Carbohydrate  
539 recognition and lysis by bacterial peptidoglycan hydrolases. *Curr Opin Struct Biol*  
540 44:87-100.
- 541 16. Mavrici D, Marakalala MJ, Holton JM, Prigozhin DM, Gee CL, Zhang YJ, Rubin  
542 EJ, Alber T. 2014. *Mycobacterium tuberculosis* FtsX extracellular domain  
543 activates the peptidoglycan hydrolase, RipC. *Proc Natl Acad Sci U S A*  
544 doi:10.1073/pnas.1321812111.
- 545 17. Margulieux KR, Liebov BK, Tirumala V, Singh A, Bushweller JH, Nakamoto RK,  
546 Hughes MA. 2017. *Bacillus anthracis* Peptidoglycan Integrity Is Disrupted by the  
547 Chemokine CXCL10 through the FtsE/X Complex. *Front Microbiol* 8:740.



18. Meier EL, Daitch AK, Yao Q, Bhargava A, Jensen GJ, Goley ED. 2017. FtsEX-mediated regulation of the final stages of cell division reveals morphogenetic plasticity in *Caulobacter crescentus*. *PLoS Genet* 13:e1006999.
19. Zielinska A, Billini M, Moll A, Kremer K, Briegel A, Izquierdo Martinez A, Jensen GJ, Thanbichler M. 2017. LytM factors affect the recruitment of autolysins to the cell division site in *Caulobacter crescentus*. *Mol Microbiol* 106:419-438.
20. Sham LT, Jensen KR, Bruce KE, Winkler ME. 2013. Involvement of FtsE ATPase and FtsX extracellular loops 1 and 2 in FtsEX-PcsB complex function in cell division of *Streptococcus pneumoniae* D39. *MBio* 4.
21. Sham LT, Barendt SM, Kopecky KE, Winkler ME. 2011. Essential PcsB putative peptidoglycan hydrolase interacts with the essential FtsXSpn cell division protein in *Streptococcus pneumoniae* D39. *Proc Natl Acad Sci U S A* 108:E1061-9.
22. Bartual SG, Straume D, Stamsas GA, Munoz IG, Alfonso C, Martinez-Ripoll M, Havarstein LS, Hermoso JA. 2014. Structural basis of PcsB-mediated cell separation in *Streptococcus pneumoniae*. *Nat Commun* 5:3842.
23. Meisner J, Montero Llopis P, Sham LT, Garner E, Bernhardt TG, Rudner DZ. 2013. FtsEX is required for CwLO peptidoglycan hydrolase activity during cell wall elongation in *Bacillus subtilis*. *Mol Microbiol* 89:1069-83.
24. Yang DC, Peters NT, Parzych KR, Uehara T, Markovski M, Bernhardt TG. 2011. An ATP-binding cassette transporter-like complex governs cell-wall hydrolysis at the bacterial cytokinetic ring. *Proc Natl Acad Sci U S A* 108:E1052-60.

25. Yang DC, Tan K, Joachimiak A, Bernhardt TG. 2012. A conformational switch controls cell wall-remodelling enzymes required for bacterial cell division. *Mol Microbiol* 85:768-81.
26. Du S, Pichoff S, Lutkenhaus J. 2016. FtsEX acts on FtsA to regulate divisome assembly and activity. *Proc Natl Acad Sci U S A* 113:E5052-61.
27. Schmidt KL, Peterson ND, Kustusch RJ, Wissel MC, Graham B, Phillips GJ, Weiss DS. 2004. A predicted ABC transporter, FtsEX, is needed for cell division in *Escherichia coli*. *J Bacteriol* 186:785-93.
28. Reddy M. 2007. Role of FtsEX in cell division of *Escherichia coli*: viability of ftsEX mutants is dependent on functional Sufl or high osmotic strength. *J Bacteriol* 189:98-108.
29. Fu Y, Bruce KE, Rued B, Winkler ME, Giedroc DP. 2016. <sup>1</sup>H, <sup>13</sup>C, <sup>15</sup>N resonance assignments of the extracellular loop 1 domain (ECL1) of *Streptococcus pneumoniae* D39 FtsX, an essential cell division protein. *Biomol NMR Assign* 10:89-92.
30. Zweckstetter M. 2008. NMR: prediction of molecular alignment from structure using the PALES software. *Nat Protoc* 3:679-90.
31. Ishima R. 2014. CPMG relaxation dispersion. *Methods Mol Biol* 1084:29-49.
32. Bajaj R, Bruce KE, Davidson AL, Rued BE, Stauffacher CV, Winkler ME. 2016. Biochemical characterization of essential cell division proteins FtsX and FtsE that mediate peptidoglycan hydrolysis by PcsB in *Streptococcus pneumoniae*. *Microbiologyopen* 5:738-752.

33. Sung CK, Li H, Claverys JP, Morrison DA. 2001. An rpsL cassette, janus, for gene replacement through negative selection in *Streptococcus pneumoniae*. *Appl Environ Microbiol* 67:5190-6.
34. Jacobsen FE, Kazmierczak KM, Lisher JP, Winkler ME, Giedroc DP. 2011. Interplay between manganese and zinc homeostasis in the human pathogen *Streptococcus pneumoniae*. *Metallomics* 3:38-41.
35. Martin JE, Lisher JP, Winkler ME, Giedroc DP. 2017. Perturbation of manganese metabolism disrupts cell division in *Streptococcus pneumoniae*. *Mol Microbiol* 104:334-348.
36. Locher KP. 2016. Mechanistic diversity in ATP-binding cassette (ABC) transporters. *Nat Struct Mol Biol* 23:487-93.
37. Rees DC, Johnson E, Lewinson O. 2009. ABC transporters: the power to change. *Nat Rev Mol Cell Biol* 10:218-27.
38. Crow A, Greene NP, Kaplan E, Koronakis V. 2017. Structure and mechanotransmission mechanism of the MacB ABC transporter superfamily. *Proc Natl Acad Sci U S A* 114:12572-12577.
39. Ottiger M, Delaglio F, Bax A. 1998. Measurement of J and dipolar couplings from simplified two-dimensional NMR spectra. *J Magn Reson* 131:373-8.
40. Yamazaki T, Yoshida M, Nagayama K. 1993. Complete assignments of magnetic resonances of ribonuclease H from *Escherichia coli* by double- and triple-resonance 2D and 3D NMR spectroscopies. *Biochemistry* 32:5656-69.
41. Lee W, Tonelli M, Markley JL. 2015. NMRFAM-SPARKY: enhanced software for biomolecular NMR spectroscopy. *Bioinformatics* 31:1325-7.

42. Vranken WF, Boucher W, Stevens TJ, Fogh RH, Pajon A, Llinas M, Ulrich EL, Markley JL, Ionides J, Laue ED. 2005. The CCPN data model for NMR spectroscopy: development of a software pipeline. *Proteins* 59:687-96.
43. Maciejewski MW, Schuyler AD, Gryk MR, Moraru, II, Romero PR, Ulrich EL, Eghbalnia HR, Livny M, Delaglio F, Hoch JC. 2017. NMRbox: A Resource for Biomolecular NMR Computation. *Biophys J* 112:1529-1534.
44. Delaglio F, Grzesiek S, Vuister GW, Zhu G, Pfeifer J, Bax A. 1995. NMRPipe: a multidimensional spectral processing system based on UNIX pipes. *J Biomol NMR* 6:277-93.
45. Kabsch W. 2010. Xds. *Acta Crystallogr D Biol Crystallogr* 66:125-32.
46. Evans PR, Murshudov GN. 2013. How good are my data and what is the resolution? *Acta Crystallogr D Biol Crystallogr* 69:1204-14.
47. Matthews BW. 1968. Some crystal forms of bovine chymotrypsinogen B and chymotrypsinogen A. *J Mol Biol* 33:499-501.
48. Adams PD, Afonine PV, Bunkoczi G, Chen VB, Davis IW, Echols N, Headd JJ, Hung LW, Kapral GJ, Grosse-Kunstleve RW, McCoy AJ, Moriarty NW, Oeffner R, Read RJ, Richardson DC, Richardson JS, Terwilliger TC, Zwart PH. 2010. PHENIX: a comprehensive Python-based system for macromolecular structure solution. *Acta Crystallogr D Biol Crystallogr* 66:213-21.
49. Emsley P, Lohkamp B, Scott WG, Cowtan K. 2010. Features and development of Coot. *Acta Crystallogr D Biol Crystallogr* 66:486-501.
50. Chen VB, Arendall WB, 3rd, Headd JJ, Keedy DA, Immormino RM, Kapral GJ, Murray LW, Richardson JS, Richardson DC. 2010. MolProbity: all-atom structure

validation for macromolecular crystallography. *Acta Crystallogr D Biol Crystallogr* 66:12-21.

51. Lanie JA, Ng WL, Kazmierczak KM, Andrzejewski TM, Davidsen TM, Wayne KJ, Tettelin H, Glass JI, Winkler ME. 2007. Genome sequence of Avery's virulent serotype 2 strain D39 of *Streptococcus pneumoniae* and comparison with that of unencapsulated laboratory strain R6. *J Bacteriol* 189:38-51.
52. Land AD, Tsui HC, Kocaoglu O, Vella SA, Shaw SL, Keen SK, Sham LT, Carlson EE, Winkler ME. 2013. Requirement of essential Pbp2x and GpsB for septal ring closure in *Streptococcus pneumoniae* D39. *Mol Microbiol* 90:939-55.
53. Tsui HC, Zheng JJ, Magallon AN, Ryan JD, Yunck R, Rued BE, Bernhardt TG, Winkler ME. 2016. Suppression of a deletion mutation in the gene encoding essential PBP2b reveals a new lytic transglycosylase involved in peripheral peptidoglycan synthesis in *Streptococcus pneumoniae* D39. *Mol Microbiol* 100:1039-65.

**TABLE 1.** Structural statistics for NMR solution structure of FtsX<sub>ECL1</sub> (From the ensemble of 20 best NMR structures).

|                                                        |          |
|--------------------------------------------------------|----------|
| <b>NMR structure (PDB code)</b>                        | 6MK7     |
| <b>(BMRB code)</b>                                     | 30523    |
| <b>NMR distance and angle restraints</b>               |          |
| Total NOE-based distance constraints                   | 1711     |
| intraresidue (i=j)                                     | 232      |
| sequential ( $ i-j  = 1$ )                             | 499      |
| medium-range ( $1 <  i-j  < 5$ )                       | 365      |
| long-Range ( $ i-j  \geq 4$ )                          | 615      |
| Maximum distance violation                             | 0.49 Å   |
| Dihedral angle restraints                              | 110      |
| Maximum dihedral angle violation                       | 7°       |
| Total number of RDCs used (measured)                   | 82 (112) |
| Q factor                                               | 0.11     |
|                                                        | (0.39)   |
| Correlation (experimental to calculated)               | 0.99     |
|                                                        | (0.89)   |
| <b>RMS deviations from idealized covalent geometry</b> |          |
| Covalent Bond Lengths (Å)                              | 0.011 Å  |
| Covalent Angle Values (°)                              | 1.3 °    |
| <b>Ramachandran analysis<sup>a,b</sup></b>             |          |
| Most favored (%)                                       | 86.5     |
| Additionally allowed (%)                               | 8.4      |
| Generously allowed (%)                                 | 1.8      |
| Disallowed (%)                                         | 3.3      |
| <b>RMSD Values</b>                                     |          |
| Backbone atoms (all)                                   | 1.5 Å    |
| All heavy atoms (all)                                  | 1.9 Å    |
| Backbone atoms (core <sup>a</sup> )                    | 0.4 Å    |
| All heavy atoms (core <sup>a</sup> )                   | 0.9 Å    |

655       <sup>a</sup>Calculated over the core of the structure, excluding the helical  
656       lobe and  $\beta$ -hairpin, residues 59-65, 89-108, 134-165. <sup>b</sup>As  
657       computed by Procheck.  
658  
659

660

**TABLE 2.** Crystallographic data collection and refinement statistics.<sup>a</sup>

|                                              | <b>FtsX<sub>ECL</sub>:D1</b>      | <b>FtsX<sub>ECL</sub>:D2</b>      | <b>FtsX<sub>ECL</sub>:D3</b>      |
|----------------------------------------------|-----------------------------------|-----------------------------------|-----------------------------------|
| <b>Data collection</b>                       |                                   |                                   |                                   |
| Wavelength (Å)                               | 0.97934                           | 0.97934                           | 0.97934                           |
| Space group                                  | P 4 <sub>3</sub> 2 <sub>1</sub> 2 | P 4 <sub>3</sub> 2 <sub>1</sub> 2 | P 4 <sub>3</sub> 2 <sub>1</sub> 2 |
| Unit cell <i>a</i> , <i>b</i> , <i>c</i> (Å) | 75.87, 75.87,<br>97.93            | 84.61, 84.61,<br>106.19           | 75.49, 75.49,<br>95.31            |
| Unit cell $\alpha, \beta, \gamma$ (°)        | 90, 90, 90                        | 90, 90, 90                        | 90, 90, 90                        |
| T (K)                                        | 100                               | 100                               | 100                               |
| X-ray source                                 | Synchrotron                       | Synchrotron                       | Synchrotron                       |
| Resolution range (Å)                         | 47.05–(2.05–2.0)                  | 44.97(2.38–2.3)                   | 46.58–(2.23–2.16)                 |
| Unique reflections                           | 19992 (1436)                      | 17781 (1700)                      | 15360 (1496)                      |
| Completeness (%)                             | 100 (100)                         | 100 (100)                         | 99.85 (99.93)                     |
| Multiplicity                                 | 24.4 (25.9)                       | 22.1 (22.5)                       | 16.6 (21.8)                       |
| $R_{pim}^d$                                  | 0.013 (0.535)                     | 0.007 (0.123)                     | 0.010 (0.241)                     |
| $\langle I/\sigma(I) \rangle$                | 21.9 (1.5)                        | 41.7 (4.6)                        | 24.6 (2.55)                       |
| CC1/2                                        | 1.00 (0.67)                       | 1.00 (0.98)                       | 1.00 (0.89)                       |
| <b>Refinement</b>                            |                                   |                                   |                                   |
| Resolution range (Å)                         | 41.14–2.0                         | 42.31–2.3                         | 46.58–2.16                        |
| $R_{work}/R_{free}^c$                        | 0.24/ 0.28                        | 0.26/ 0.30                        | 0.25/ 0.31                        |
| No. Atoms                                    |                                   |                                   |                                   |
| Protein                                      | 1888                              | 1732                              | 1856                              |
| Water                                        | 25                                | 21                                | 23                                |
| Ligand                                       | 16                                | 47                                | 33                                |
| <b>R.m.s. deviations</b>                     |                                   |                                   |                                   |
| Bond length (Å)                              | 0.008                             | 0.009                             | 0.010                             |
| Bond angles (°)                              | 1.27                              | 1.22                              | 1.29                              |



## Ramachandran

|                      |            |            |            |
|----------------------|------------|------------|------------|
| Favored/outliers (%) | 95.65/0.43 | 93.20/2.43 | 92.41/0.00 |
| Monomers per AU      | 2          | 2          | 2          |
| <b>PDB code</b>      | 6HE6       | 6HEE       | 6HFX       |

<sup>a</sup>Values between parentheses correspond to the highest resolution shells

<sup>b</sup> $R_{\text{pim}} = \sum_{\text{hkl}} [1/(N - 1)]^{1/2} \sum_i |I_i(\text{hkl}) - [I(\text{hkl})]| / \sum_{\text{hkl}} \sum_i I_i(\text{hkl})$ , where  $\sum_i I_i(\text{hkl})$  is the  $i$ -th measurement of reflection hkl,  $[I(\text{hkl})]$  is the weighted mean of all measurements and N is the redundancy for the hkl reflection. <sup>c</sup> $R_{\text{work}}/R_{\text{free}} = \sum_{\text{hkl}} |F_o - F_c| / \sum_{\text{hkl}} |F_o|$ , where  $F_c$  is the calculated and  $F_o$  is the observed structure factor amplitude of reflection hkl for the working / free (5%) set, respectively.

**TABLE 3.** Thermodynamic parameters of wild-type and mutant FtsX<sub>ECL1</sub> from direct analysis of isothermal titration calorimetry (ITC).<sup>a</sup>

| Experiment | Protein              | $K_A$ (x 10 <sup>4</sup> M <sup>-1</sup> ) | $K_D$ (μM)       | $\Delta H$ (kcal mol <sup>-1</sup> ) | $\Delta S$ (kcal mol <sup>-1</sup> K <sup>-1</sup> ) |
|------------|----------------------|--------------------------------------------|------------------|--------------------------------------|------------------------------------------------------|
| ITC        | FtsX <sub>ECL1</sub> | 3.0 ± 0.5                                  | 34 ± 6           | -2.1 ± 0.2                           | 13.4                                                 |
| ITC        | L115A, M119A         | N/A <sup>b</sup>                           | N/A <sup>b</sup> | N/A <sup>c</sup>                     | N/A <sup>c</sup>                                     |
|            | FtsX <sub>ECL1</sub> |                                            |                  |                                      |                                                      |

<sup>a</sup> Solution conditions: 50 mM sodium phosphate, 50 mM NaCl, 0.5 mM EDTA, pH 7.0 at 25 °C. The chemical model used to fit the data is indicated in *Supplemental Materials and Methods*. <sup>b</sup>No observed heat.

675 **TABLE 4.** Amino acid changes made *in vivo* to disrupt the FtsX<sub>ECL1</sub>-PcsB interaction.<sup>a</sup>

| Categories of Amino Acid Changes Made                         |                            |                            |                                  |
|---------------------------------------------------------------|----------------------------|----------------------------|----------------------------------|
|                                                               | Amino Acid Change          | Defect in Shape and Growth | Location in FtsX <sub>ECL1</sub> |
| Class I                                                       | E109A                      | Shape Only                 | α2 helix                         |
|                                                               | E109Q                      | No                         | α2 helix                         |
|                                                               | Q111A                      | No <sup>b</sup>            | α2 helix                         |
|                                                               | L115A                      | Shape Only                 | α2 helix                         |
|                                                               | M119A                      | Shape Only                 | α2 helix                         |
|                                                               | W123A                      | Shape Only                 | Loop <sup>c</sup>                |
|                                                               | F126A                      | Shape Only                 | Loop <sup>c</sup>                |
|                                                               | N131A                      | Shape Only                 | Loop <sup>c</sup>                |
|                                                               | N131D                      | Shape Only                 | Loop <sup>c</sup>                |
| Class II                                                      | E109A, N131A               | Shape Only                 | α2 helix, Loop <sup>c</sup>      |
|                                                               | Q111A, L115C               | Shape Only                 | α2 helix                         |
|                                                               | L115A, M119A               | Yes                        | α2 helix                         |
|                                                               | E109A, Q111A, L115A, M119A | Yes                        | α2 helix                         |
|                                                               | F126A, W123A, N131A        | Yes                        | Loop <sup>c</sup>                |
| Class III<br>(Gly <sub>3</sub> Ser) <sub>2</sub> <sup>d</sup> | Residue 51                 | Yes                        | post-TM1                         |
|                                                               | Residue 78                 | Shape Only                 | β-hairpin                        |
|                                                               | Residue 173                | N/A <sup>e</sup>           | pre-TM2                          |

<sup>a</sup>See Table S1 for corresponding strain number and strain construction for each amino acid change or insertion. <sup>b</sup>In the absence of zinc, this strain had no morphology defects. Morphology defects were observed at 3 h when the strain was expressing both the wild-type copy of FtsX and FtsX(Q111A). <sup>c</sup>Loop refers to the unstructured loop after  $\alpha 2$  helix in the helical lobe of the FtsX<sub>ECL1</sub> structure. <sup>d</sup>These strains an insertion of the amino acid sequence GGGSGGGS after the indicated residue. <sup>e</sup>N/A: This strain did not express FtsX with (Gly<sub>3</sub>Ser)<sub>2</sub> insertion. See Fig. 4E for Western blot data.

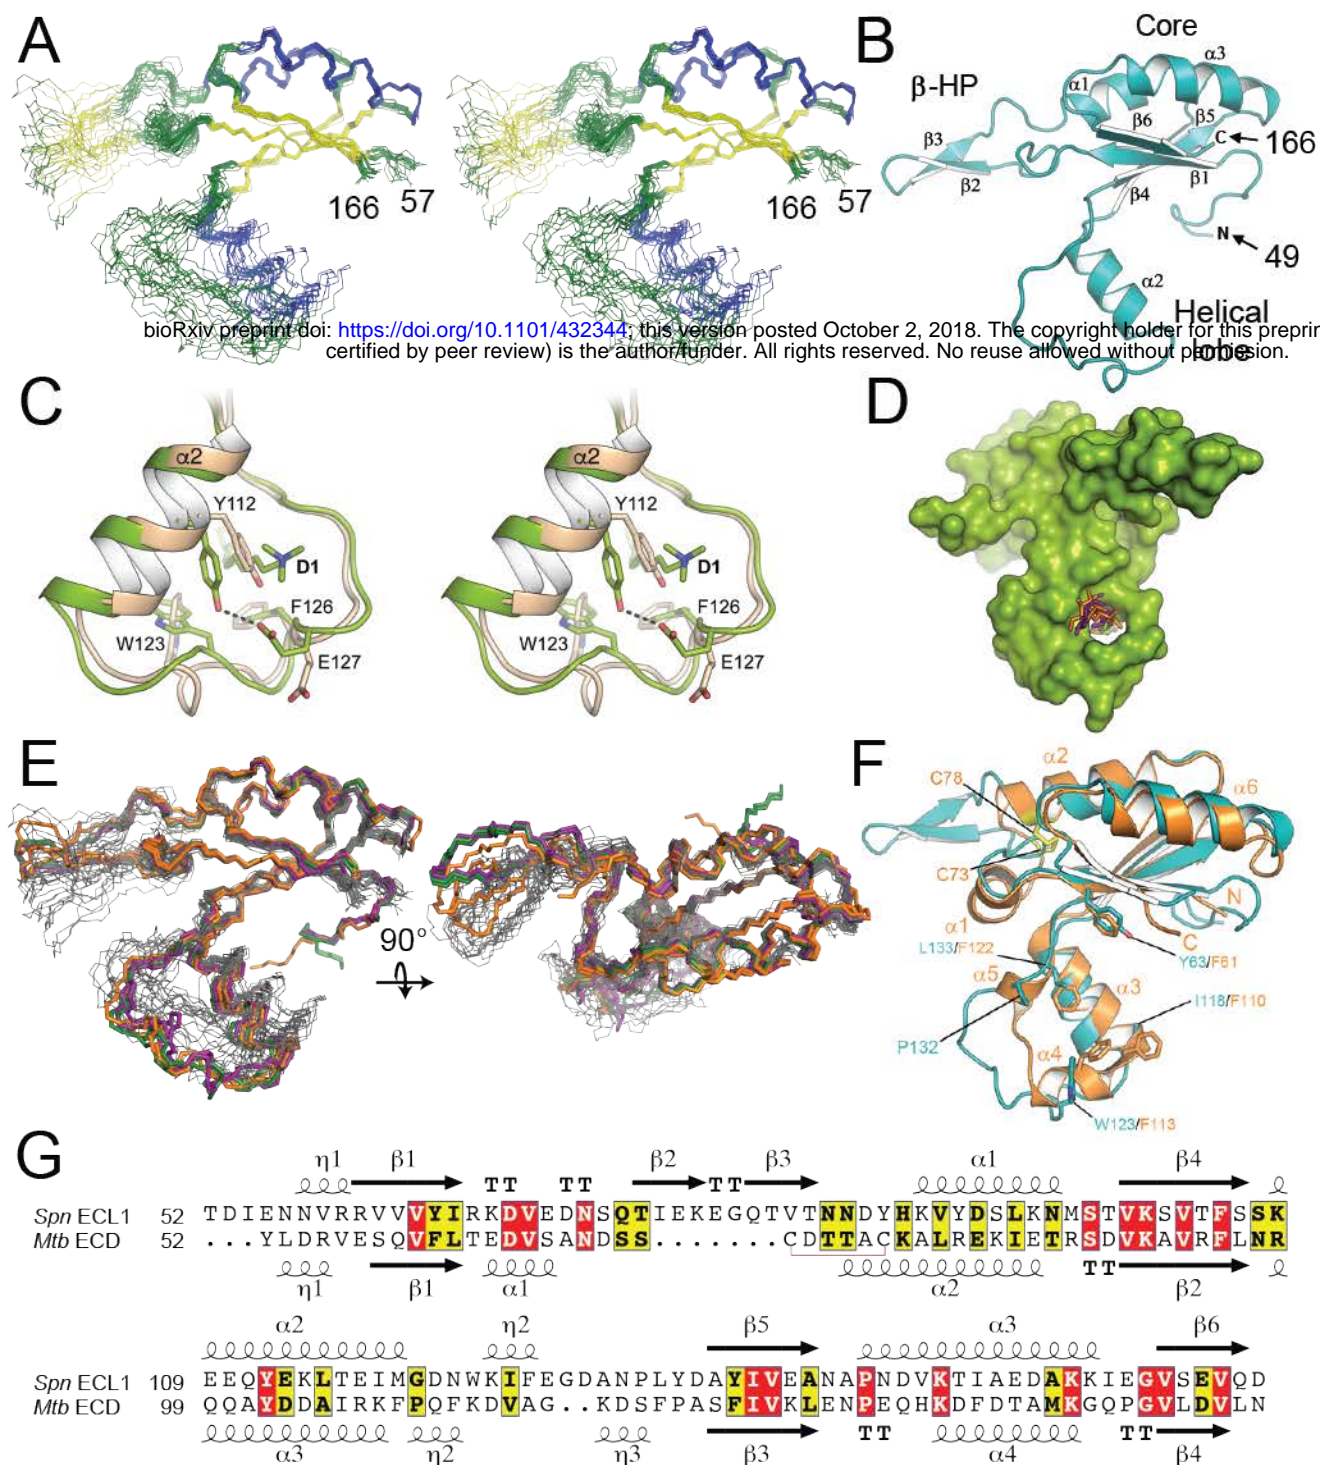

Figure 1: The structure of FtsX<sub>ECL1</sub> from *Streptococcus pneumoniae*. A) Stereo view of the 20 conformers of the FtsX<sub>ECL1</sub> NMR structure as backbone traces, with helices shown in blue and  $\beta$ -strands shown in yellow. N- and C- termini of the domain are indicated by the residue numbers 57 and 166, respectively. B) Cartoon representation of the FtsX<sub>ECL1</sub> structure obtained by X-ray crystallography (chain B in FtsX<sub>ECD</sub>-D1) in which the different secondary structure elements have been numbered and labeled. N- and C- termini of the domain are indicated and correspond to residue numbers 49 and 166, respectively. C) Stereo view showing changes in helical lobe upon interaction with detergent 1. Apo-form (chain B) is colored in pale brown and holo-form (chain A) is colored in green. Relevant residues affected by the presence of the detergent are depicted in capped sticks. Polar interaction represented by dashed line. D) Surface representation of the FtsX<sub>ECL1</sub> crystal structure in which the three different detergent molecules are superimposed and shown in sticks (detergent 1, 2 and 3 are colored in green orange and purple, respectively). E) Overlay of the backbone traces for the six FtsX<sub>ECL1</sub> crystal structures (colored in green, orange, and purple, in the presence of detergent 1, 2, and 3, respectively) with the backbone traces of the 20 FtsX<sub>ECL1</sub> NMR conformers (in green). F) Structural superposition of the crystal structure of FtsX<sub>ECL1</sub> from *S. pneumoniae* obtained by crystallography (colored in cyan) and the crystal structure of FtsX<sub>ECD</sub> from *M. tuberculosis* (PDB 4N8N, colored in orange). Secondary structure elements observed in the *M. tuberculosis* structure are labeled. Some residues in both structures are shown as sticks and numbered (see main text). Cys residues involved in disulfide bond formation in *M. tuberculosis* FtsX<sub>ECD</sub> are colored in yellow. See main text for details. G) Sequence alignment of ECL1 domains from *S. pneumoniae* (Spn ECL1) and *M. tuberculosis* (Mtb ECD). Secondary structure elements are indicated and numbered.



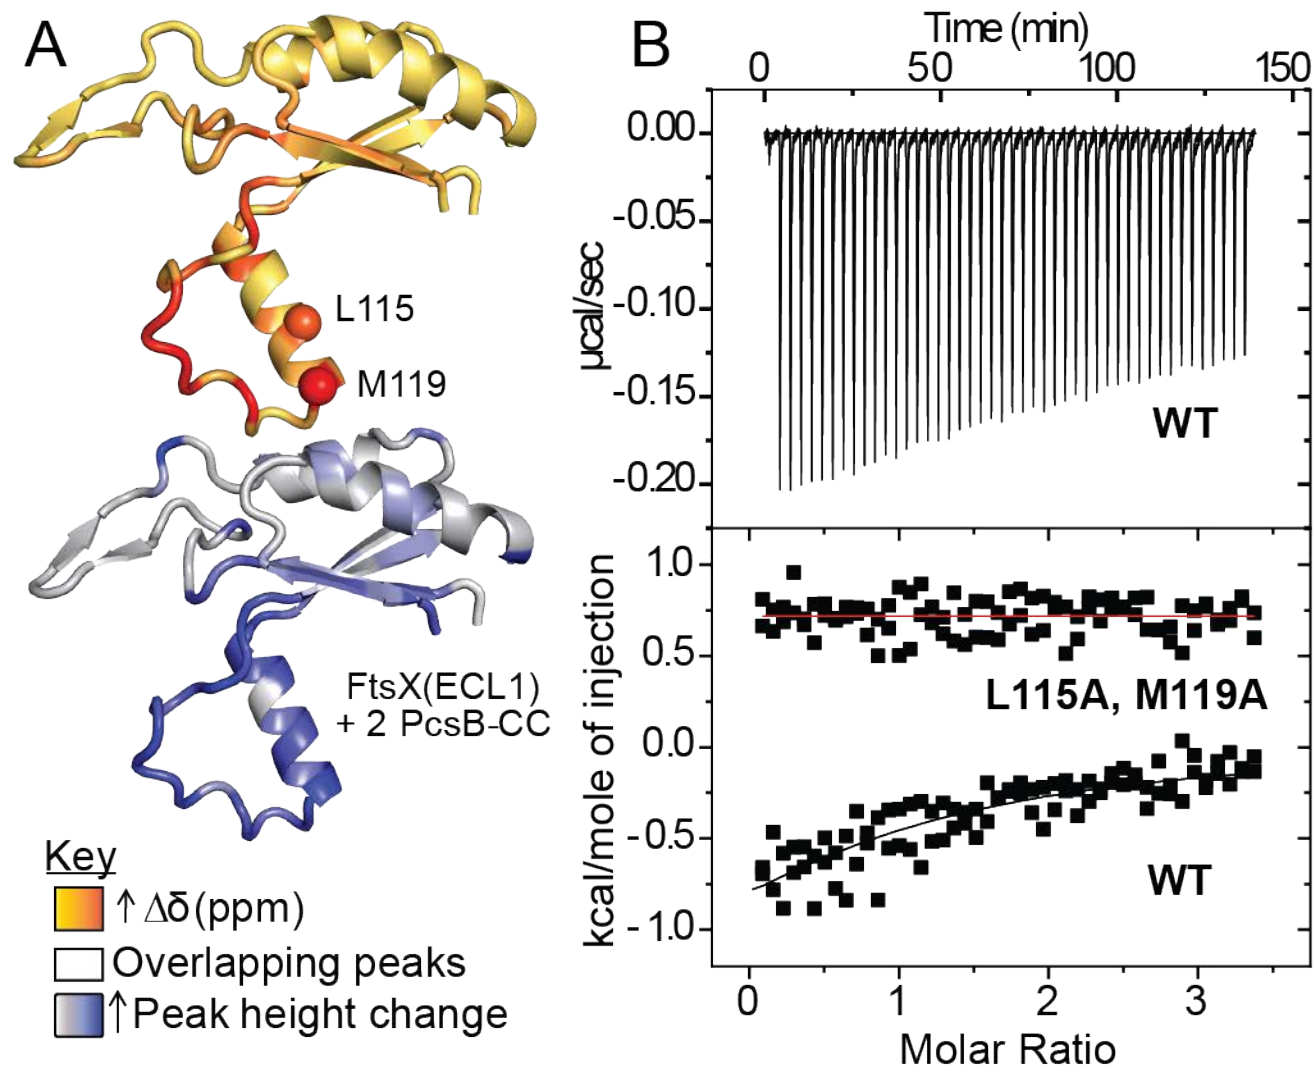

**Figure 2: FtsX<sub>ECL1</sub> binds PcsB-CC.** A) Significant chemical shifts and peak height changes upon  $^1\text{H}$ - $^{15}\text{N}$  HSQC titration of 50  $\mu\text{M}$   $^{15}\text{N}$  FtsX<sub>ECL1</sub> with 100  $\mu\text{M}$  unlabeled PcsB-CC map to the lower lobe of FtsX<sub>ECL1</sub>. Chemical shift ( $\Delta\delta$ , ppm) and peak height changes are mapped as color gradients on the FtsX<sub>ECL1</sub> structure, orange to red and light grey to blue, respectively. L115 and M119  $\alpha$  carbons are shown as spheres on the upper image. Peaks that overlap in the  $^1\text{H}$ - $^{15}\text{N}$  HSQC spectra are colored white. Chemical shift and peak height change upon addition of 2 molar equivalents of PcsB-CC to FtsX<sub>ECL1</sub> are mapped to the structure. B) Representative titration of PcsB-CC with wild-type (WT) FtsX<sub>ECL1</sub> or L115A/M119A FtsX<sub>ECL1</sub> as monitored by ITC. Conditions: 50 mM potassium phosphate, 50 mM NaCl, 0.5 mM EDTA, pH 7.0 at 25.0 °C. Top panel, corrected ITC data; bottom panel, kcal/mole of injection vs. molar ratio. The black line overlapping the WT data indicates the best fit to a one-site binding model. Fitting parameters are summarized in Table 3. A red line drawn through the L115A/M119A FtsX<sub>ECL1</sub> data is for reference.

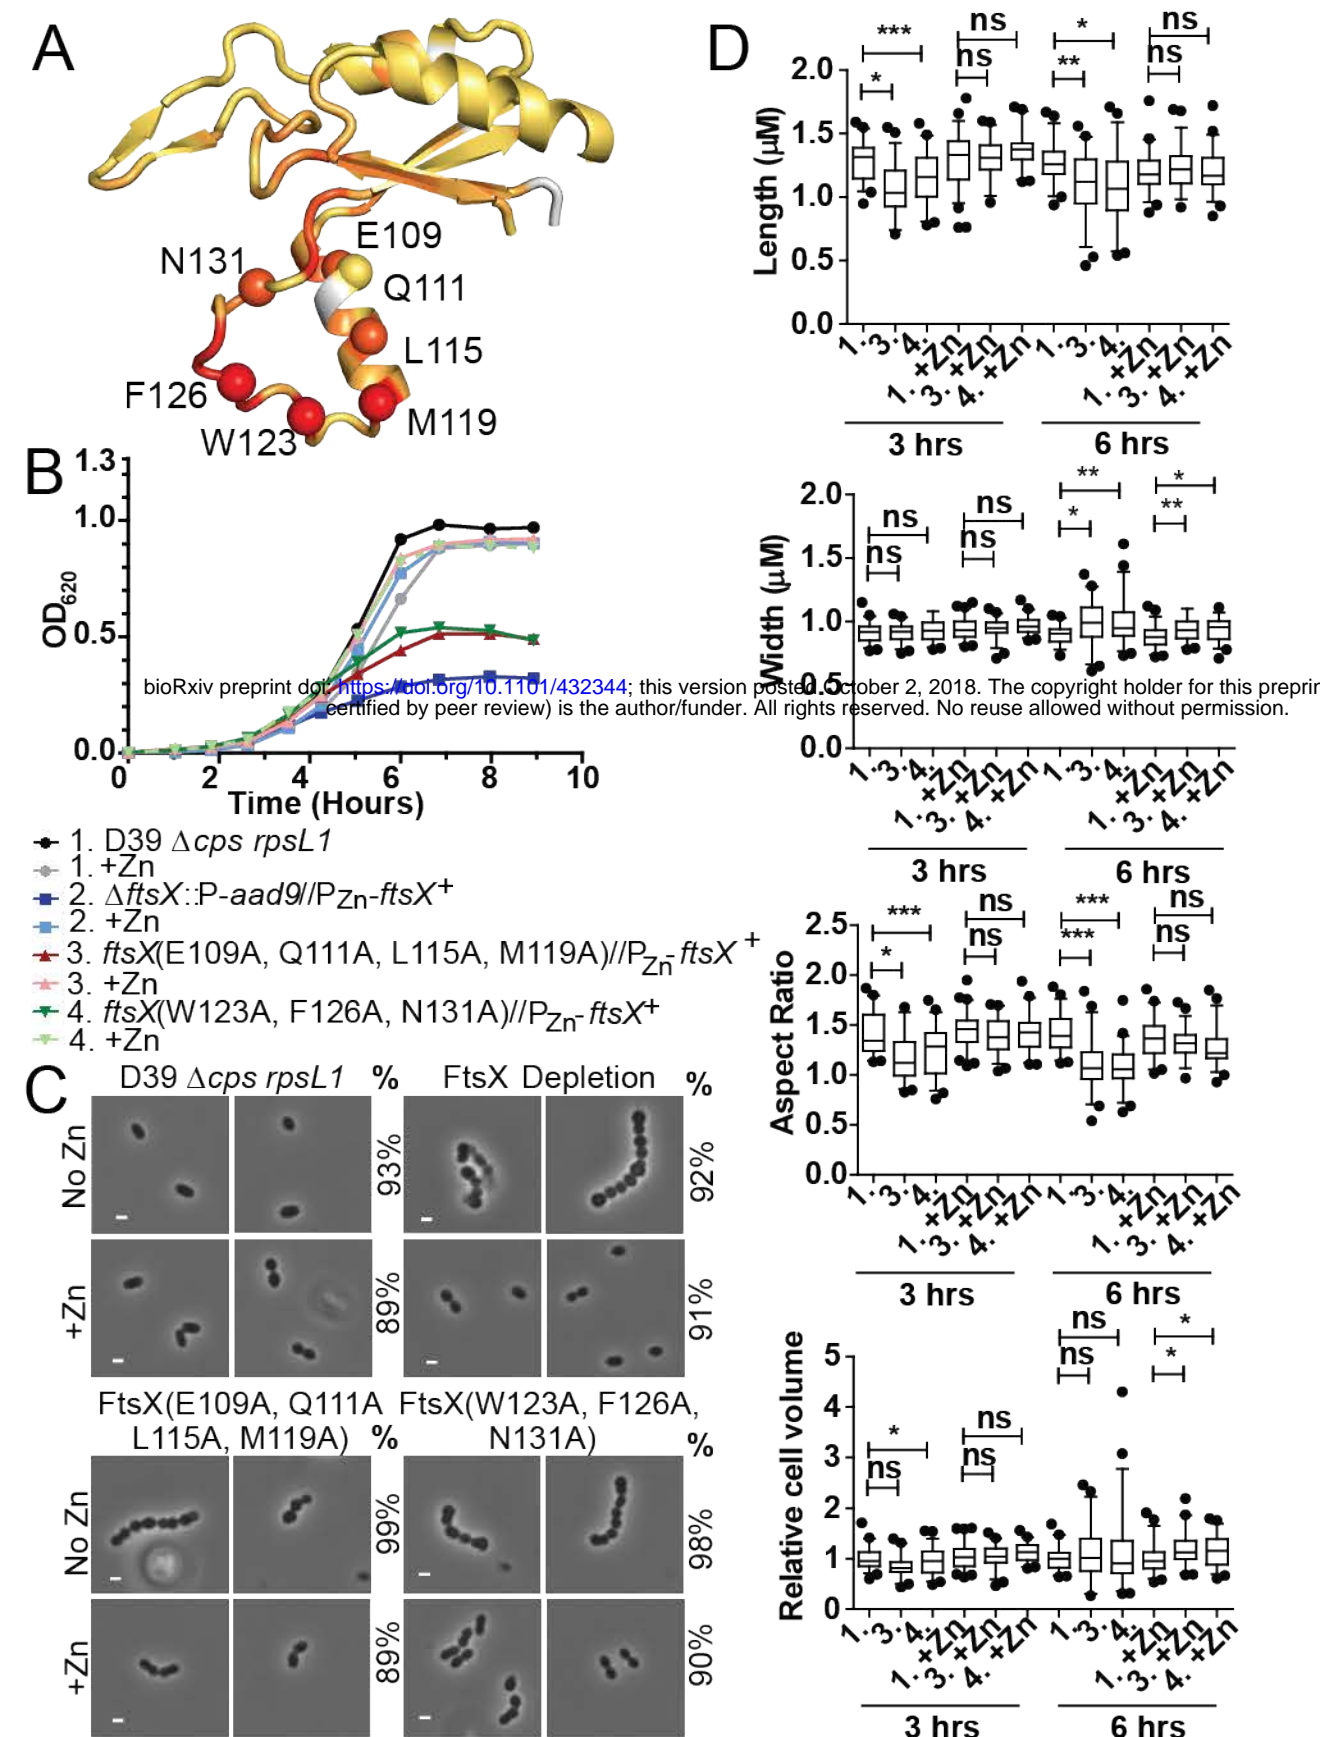

**Figure 3: Multiple amino acid changes in the lower lobe of FtsX<sub>ECL1</sub> cause morphological and growth defects.** A) Amino acid changes made mapped to the structure of FtsX<sub>ECL1</sub>. The  $\alpha$  carbon of each residue is shown as a colored sphere. The orange to red coloring on the FtsX<sub>ECL1</sub> structure represents the peak height changes from  $^1\text{H}$ - $^{15}\text{N}$  HSQC spectra upon addition of 2 molar equivalents of PcsB-CC to FtsX<sub>ECL1</sub>. B) Representative growth curve of strains with amino acid changes in the lower lobe of FtsX<sub>ECL1</sub>, compared to the growth of a FtsX depletion strain. These strains were grown in the presence or absence of 0.45 mM  $\text{ZnCl}_2$  supplemented with 0.045 mM  $\text{MnSO}_4$  (indicated as +Zn). Strains shown are as follows: black circle, D39 *rpsL1*  $\Delta cps$  wild-type parent (1, IU1824); grey circle, IU1824 +Zn; dark blue square, D39 *rpsL1*  $\Delta cps$   $\Delta ftsX::P\text{-aad9}/bgaA::tet\text{-}P_{Zn}\text{-ftsX}^+$  (2, IU12376); light blue square, IU12376 +Zn; red triangle, D39 *rpsL1*  $\Delta cps$  *ftsX*(E109A, Q111A, L115A, M119A)//*bgaA::tet\text{-}P\_{Zn}\text{-ftsX}^+ (3, IU12861); pink triangle, IU12861 +Zn; dark green inverted triangle, D39 *rpsL1*  $\Delta cps$  *ftsX*(F126A, W123A, N131A)//*bgaA::tet\text{-}P\_{Zn}\text{-ftsX}^+ (4, IU12864); light green inverted triangle, IU12864 +Zn. This growth curve was repeated three times with similar results. C) Representative images of strains at 6 hours growth. The genotype of the strain shown is indicated above each panel. No Zn or +Zn indicates if Zn/Mn mixture was added. % indicates the percentage of cells in the population that are morphologically similar to the images shown. Greater than 50 cells per strain, condition, and experimental repeat were analyzed. These experiments were performed three times independently with similar results. Scale bar shown is equal to 1  $\mu\text{m}$ . D) Length, width, aspect ratio, and relative cell volume of strains at 3 hours and 6 hours growth. Strains are indicated according to numbering in panel B. Greater than 50 cells were measured per strain and condition over two experimental replicates. For statistical analysis, a Kruskal-Wallis test (one-way ANOVA) with Dunn's multiple comparison post-test was used to determine if length, width, aspect ratio, and relative cell volume were significantly different between strains and conditions. ns=non significant, \* =  $p < 0.05$ , \*\* =  $p < 0.005$ , \*\*\* =  $p < 0.0005$ .**



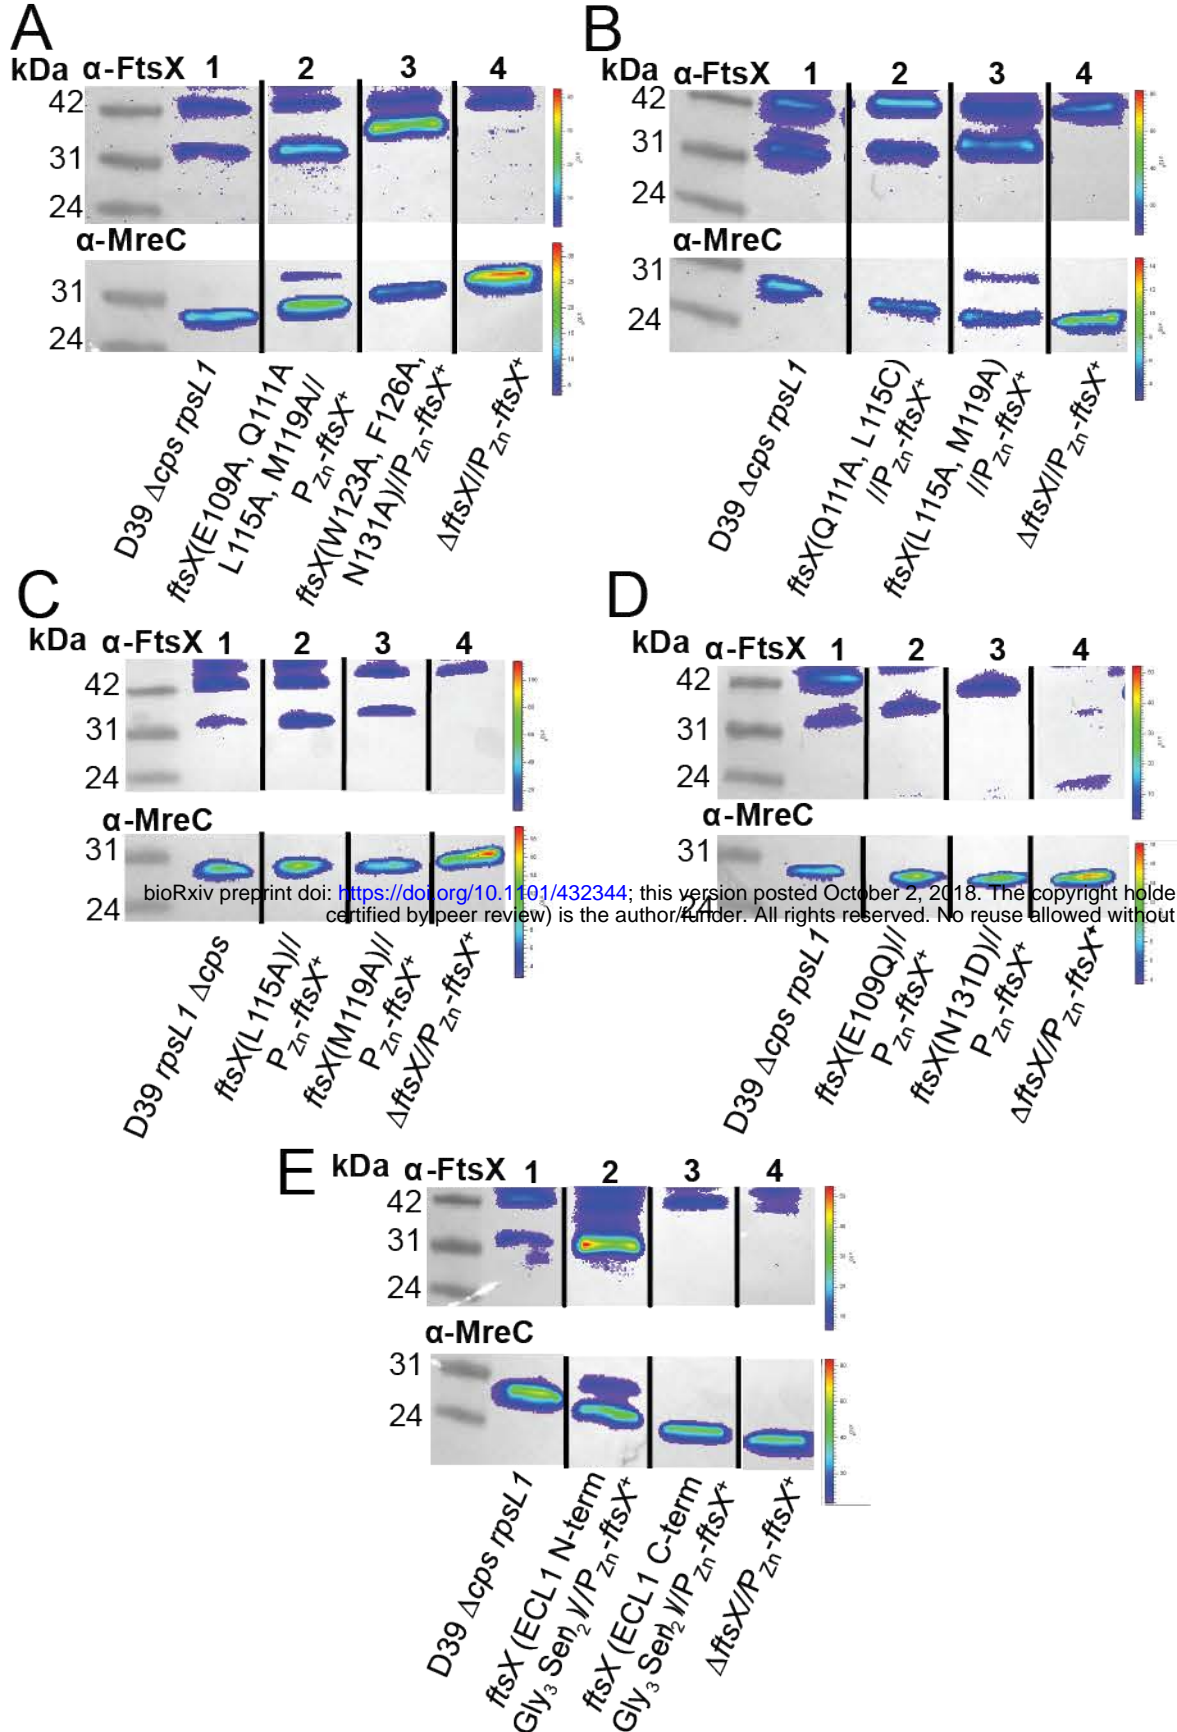

Figure 4: FtsX with amino acid changes are expressed at near wild-type levels. Representative blots of  $\alpha$ -FtsX and  $\alpha$ -MreC (Western blotting control for loading) are shown, with the genotype indicated under each lane. Expected molecular weight (MW) for FtsX is 34.2 kDa, expected MW for MreC is 29.7 kDa. Samples were grown without Zn and harvested at 6 hours growth. Westerns were imaged as described in *Supplemental Materials and Methods*. A) FtsX(E109A, Q111A, L115A, M119A) and FtsX(W123A, F126A, N131A) are expressed at or above wild-type levels without zinc. Lane 1, D39 *rpsL1*  $\Delta$ *cps* (IU1824); lane 2, D39 *rpsL1*  $\Delta$ *cps* *ftsX*(E109A, Q111A, L115A M119A)//*bgaA::tet-P<sub>Zn</sub>-ftsX<sup>+</sup>* (IU12861); lane 3, D39 *rpsL1*  $\Delta$ *cps* *ftsX*(W123A, F126A, N131A)//*bgaA::tet-P<sub>Zn</sub>-ftsX<sup>+</sup>* (IU12864); lane 4, D39 *rpsL1*  $\Delta$ *cps*  $\Delta$ *ftsX*//*bgaA::tet-P<sub>Zn</sub>-ftsX<sup>+</sup>* (IU13461). B) FtsX(Q111A, L115C) and FtsX(L115A, M119A) are expressed at near wild-type levels without zinc. Lane 1, D39 *rpsL1*  $\Delta$ *cps* (IU1824); lane 2, D39 *rpsL1*  $\Delta$ *cps* *ftsX*(Q111A, L115C)//*bgaA::tet-P<sub>Zn</sub>-ftsX<sup>+</sup>* (IU13064); lane 3, D39 *rpsL1*  $\Delta$ *cps* *ftsX*(L115A, M119A)//*bgaA::tet-P<sub>Zn</sub>-ftsX<sup>+</sup>* (IU13066); lane 4, D39 *rpsL1*  $\Delta$ *cps*  $\Delta$ *ftsX*//*bgaA::tet-P<sub>Zn</sub>-ftsX<sup>+</sup>*. C) FtsX (L115A) and FtsX (M119A) are expressed at near wild-type levels without zinc. Lane 1, D39 *rpsL1*  $\Delta$ *cps* (IU1824); lane 2, D39 *rpsL1*  $\Delta$ *cps* *ftsX*(L115A)//*bgaA::tet-P<sub>Zn</sub>-ftsX<sup>+</sup>* (IU12521); lane 3, D39 *rpsL1*  $\Delta$ *cps* *ftsX*(M119A)//*bgaA::tet-P<sub>Zn</sub>-ftsX<sup>+</sup>* (IU12637); lane 4, D39 *rpsL1*  $\Delta$ *cps*  $\Delta$ *ftsX*//*bgaA::tet-P<sub>Zn</sub>-ftsX<sup>+</sup>* (IU13461). D) FtsX (E109Q) and FtsX (N131D) are expressed at near wild-type levels without zinc. Lane 1, D39 *rpsL1*  $\Delta$ *cps* (IU1824); lane 2, D39 *rpsL1*  $\Delta$ *cps* *ftsX*(E109Q)//*bgaA::tet-P<sub>Zn</sub>-ftsX<sup>+</sup>* (IU13088); lane 3, D39 *rpsL1*  $\Delta$ *cps* *ftsX*(N131D)//*bgaA::tet-P<sub>Zn</sub>-ftsX<sup>+</sup>* (IU13089); lane 4, D39 *rpsL1*  $\Delta$ *cps*  $\Delta$ *ftsX*//*bgaA::tet-P<sub>Zn</sub>-ftsX<sup>+</sup>* (IU13461). E) FtsX with (Gly<sub>4</sub>Ser)<sub>2</sub> after residue 51 is expressed, whereas FtsX with (Gly<sub>4</sub>Ser)<sub>2</sub> after residue 173 is not expressed. These are referred to as FtsX N-term ECL1 (Gly<sub>4</sub>Ser)<sub>2</sub> and FtsX C-terminal ECL1 (Gly<sub>4</sub>Ser)<sub>2</sub>, respectively. Lane 1, D39 *rpsL1*  $\Delta$ *cps* (IU1824); lane 2, D39 *rpsL1*  $\Delta$ *cps* *ftsX* N-term ECL1 (Gly<sub>4</sub>Ser)<sub>2</sub>//*bgaA::tet-P<sub>Zn</sub>-ftsX<sup>+</sup>* (IU12629); lane 3, D39 *rpsL1*  $\Delta$ *cps* *ftsX* C-term ECL1 (Gly<sub>4</sub>Ser)<sub>2</sub>//*bgaA::tet-P<sub>Zn</sub>-ftsX<sup>+</sup>* (IU12869); lane 4, D39 *rpsL1*  $\Delta$ *cps*  $\Delta$ *ftsX*//*bgaA::tet-P<sub>Zn</sub>-ftsX<sup>+</sup>* (IU13461). These experiments were performed two to three times independently.



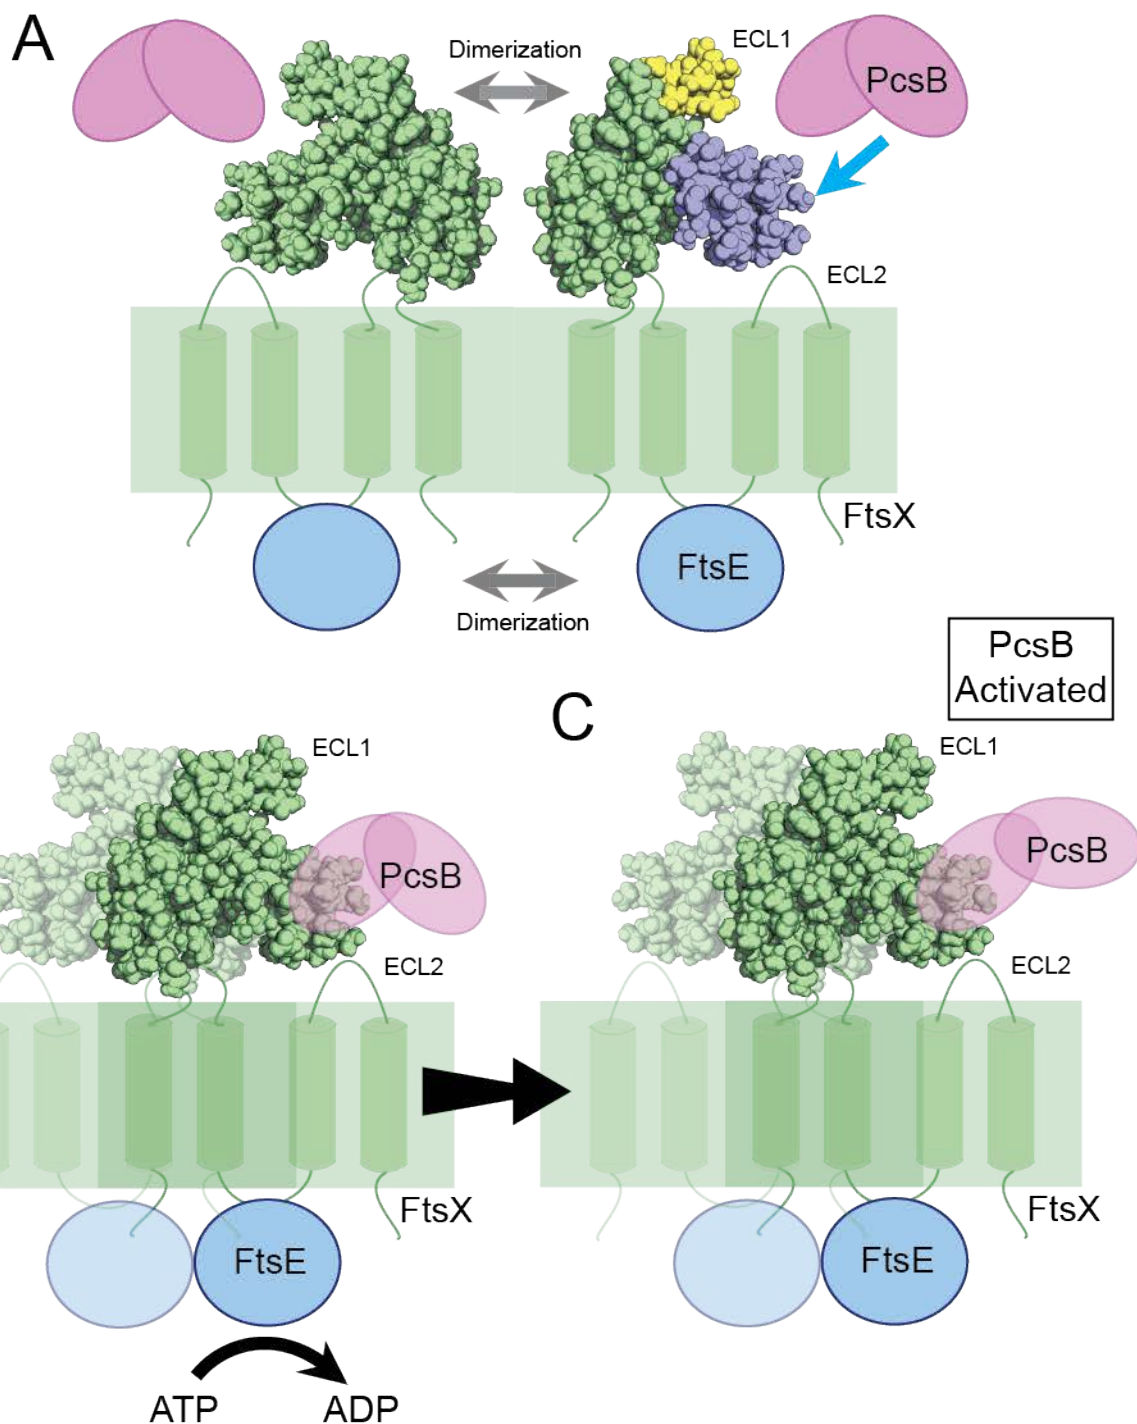

**Figure 5: Model for the activation of PcsB by FtsX<sub>ECL1</sub>.** A) FtsEX dimerizes to form the active complex. PcsB is secreted into the extracellular milieu. Attraction of PcsB to the area of active FtsX complexes might be mediated by its propensity to interact with membranes (Bajaj et. al, 2017). The ECL1 and ECL2 loops are indicated on FtsX. FtsX<sub>ECL1</sub> is shown in green, with the  $\beta$ -hairpin and  $\alpha$ -helical lobe shaded in yellow and blue, respectively. B) After formation of the active complex, ATP hydrolysis by FtsE causes a conformational change in FtsX. PcsB interacts with FtsX<sub>ECL1</sub> via its coiled coil domain, and this interaction causes activation of the peptidoglycan hydrolytic activity of PcsB. PcsB, along with other factors in the cell, allow for cell division to proceed normally. Functional FtsX, FtsE, and PcsB are all required for efficient cell division..
